# Supplementary material for: New Alk(en)ylhydroxycyclohexanes with Tyrosinase Inhibition Potential from Harpephyllum caffrum Bernh. Gum Exudate
Source: MDPI journal article supplement (doi:10.3390/molecules27123839), 2022-06-15
Supplement: s1 [file molecules-1760167-supplementary.pdf › molecules-1760167-supplementary.pdf]

## SUPPLEMENTARY MATERIAL

### **New alk(en)ylhydroxycyclohexanes with tyrosinase inhibition potential from *Harpephyllum caffrum* Bernh. gum exudate**

Olusola Bodede<sup>1,5\*</sup>, Garland K. More<sup>1</sup>, Roshila Moodley<sup>2</sup>, Paul Steenkamp<sup>3</sup>, Himansu Baijnath<sup>4</sup>, Vinesh Maharaj<sup>5</sup>, Gerhard Prinsloo<sup>1</sup>

<sup>1</sup>Department of Agriculture and Animal Health, University of South Africa, Florida, Johannesburg, 1709 South Africa

<sup>2</sup>Department of Chemistry, University of Manchester, United Kingdom

<sup>3</sup>Research Centre for Plant Metabolomics, Department of Biochemistry, University of Johannesburg, P.O. Box 524, Auckland Park 2006, South Africa

<sup>4</sup>School of Life Sciences, University of KwaZulu-Natal, Westville Campus. Private Bag X54001, Durban, 4000 South Africa

<sup>5</sup>Department of Chemistry, University of Pretoria, Hatfield 0028, South Africa

\*Correspondence: olusolabodede@gmail.com; ORCID  0000-0002-7265-1377

The NMR, FTIR and ECD spectral and HR-ESI-MS data and for compounds **1** to **4** are presented in Figure S1 to S20

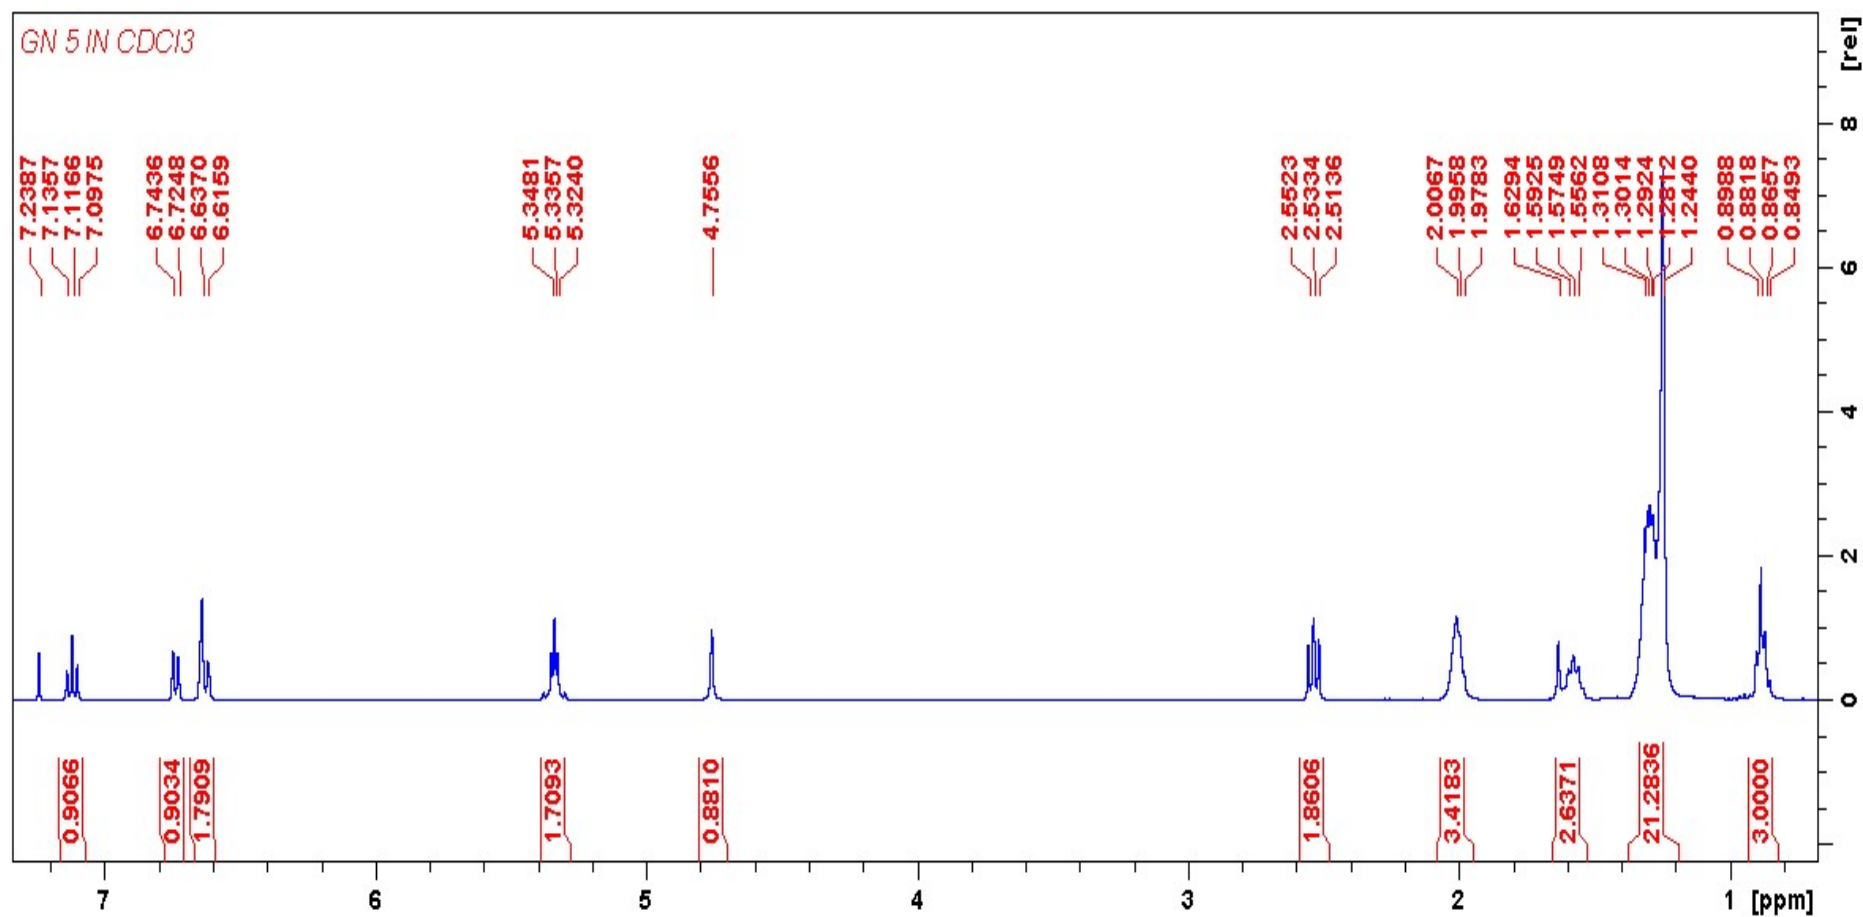

Figure S1. <sup>1</sup>H-NMR spectrum for 3-heptadec-12'-Z-enyl phenol (1)

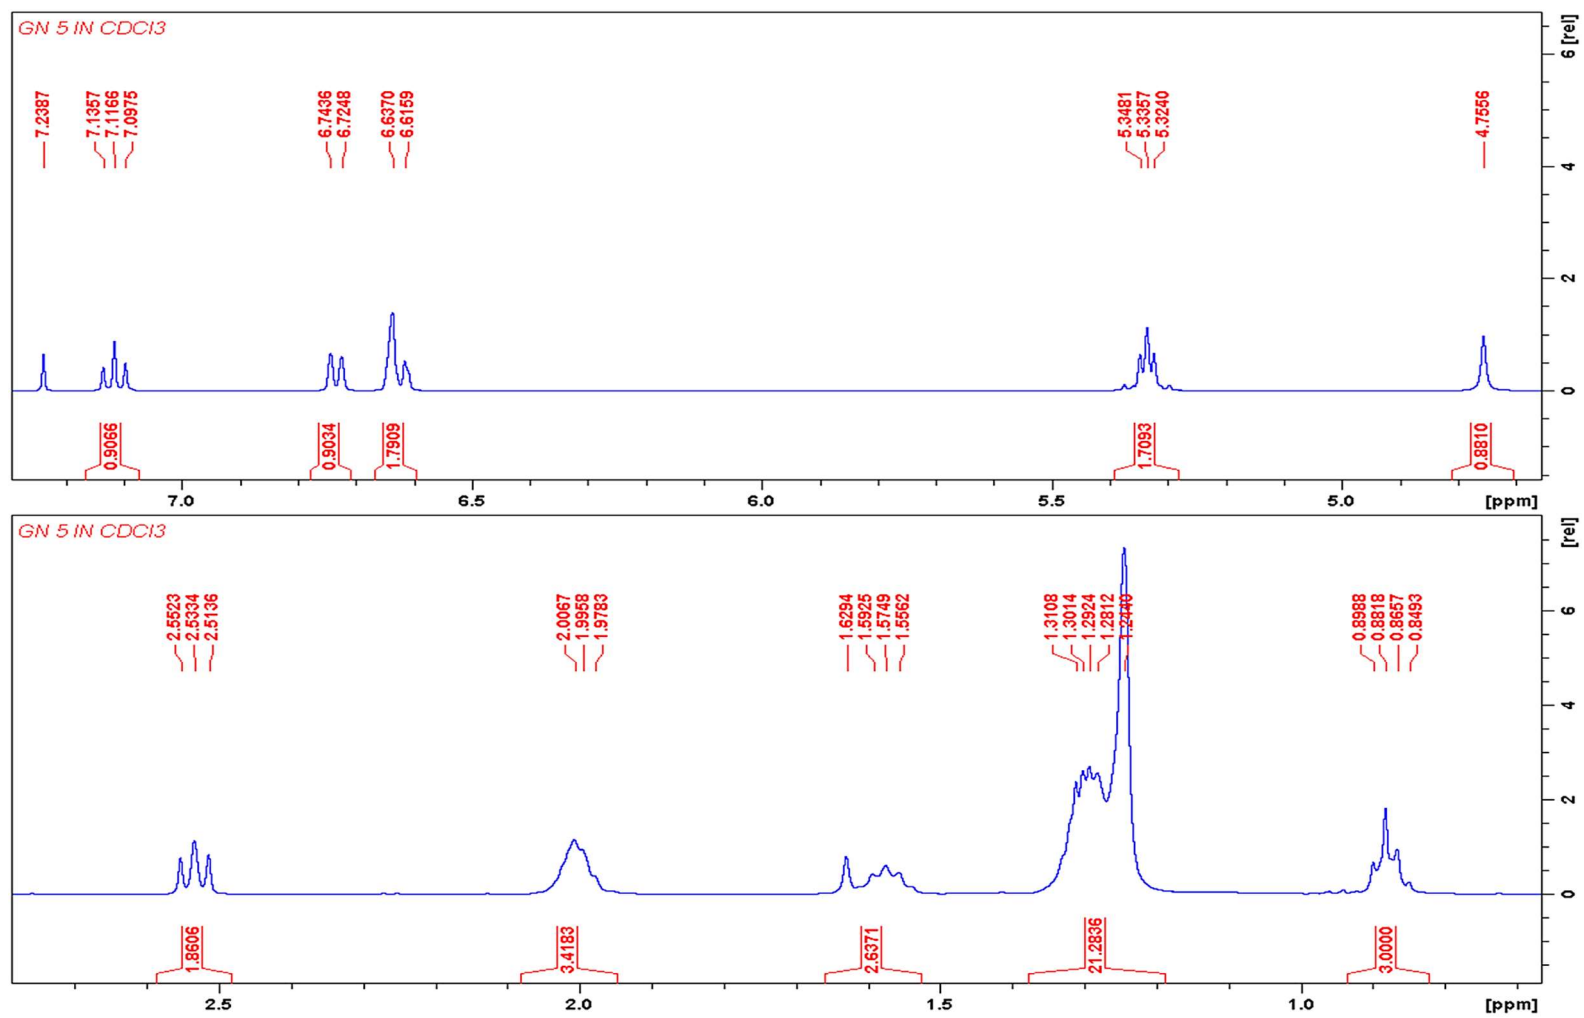

Figure S2. Expanded  $^1\text{H-NMR}$  spectrum for 3-heptadec-12'-Z-enyl phenol (1)

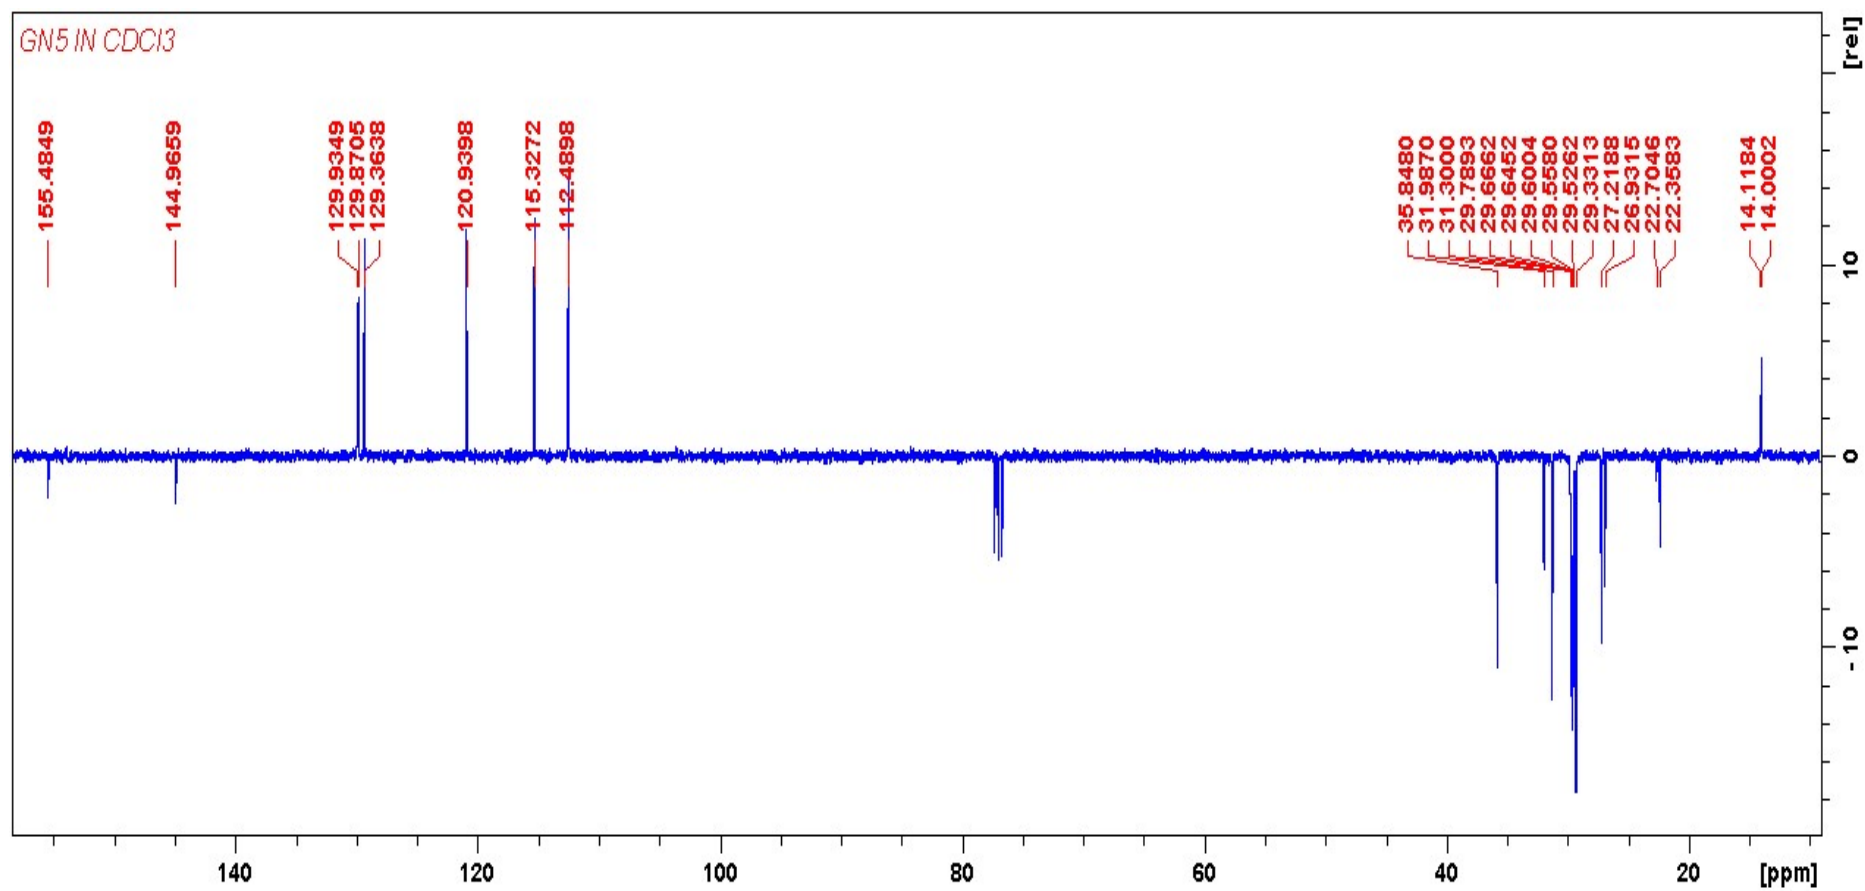

Figure S3. APT spectrum for 3-heptadec-12'-Z-enyl phenol (**1**)

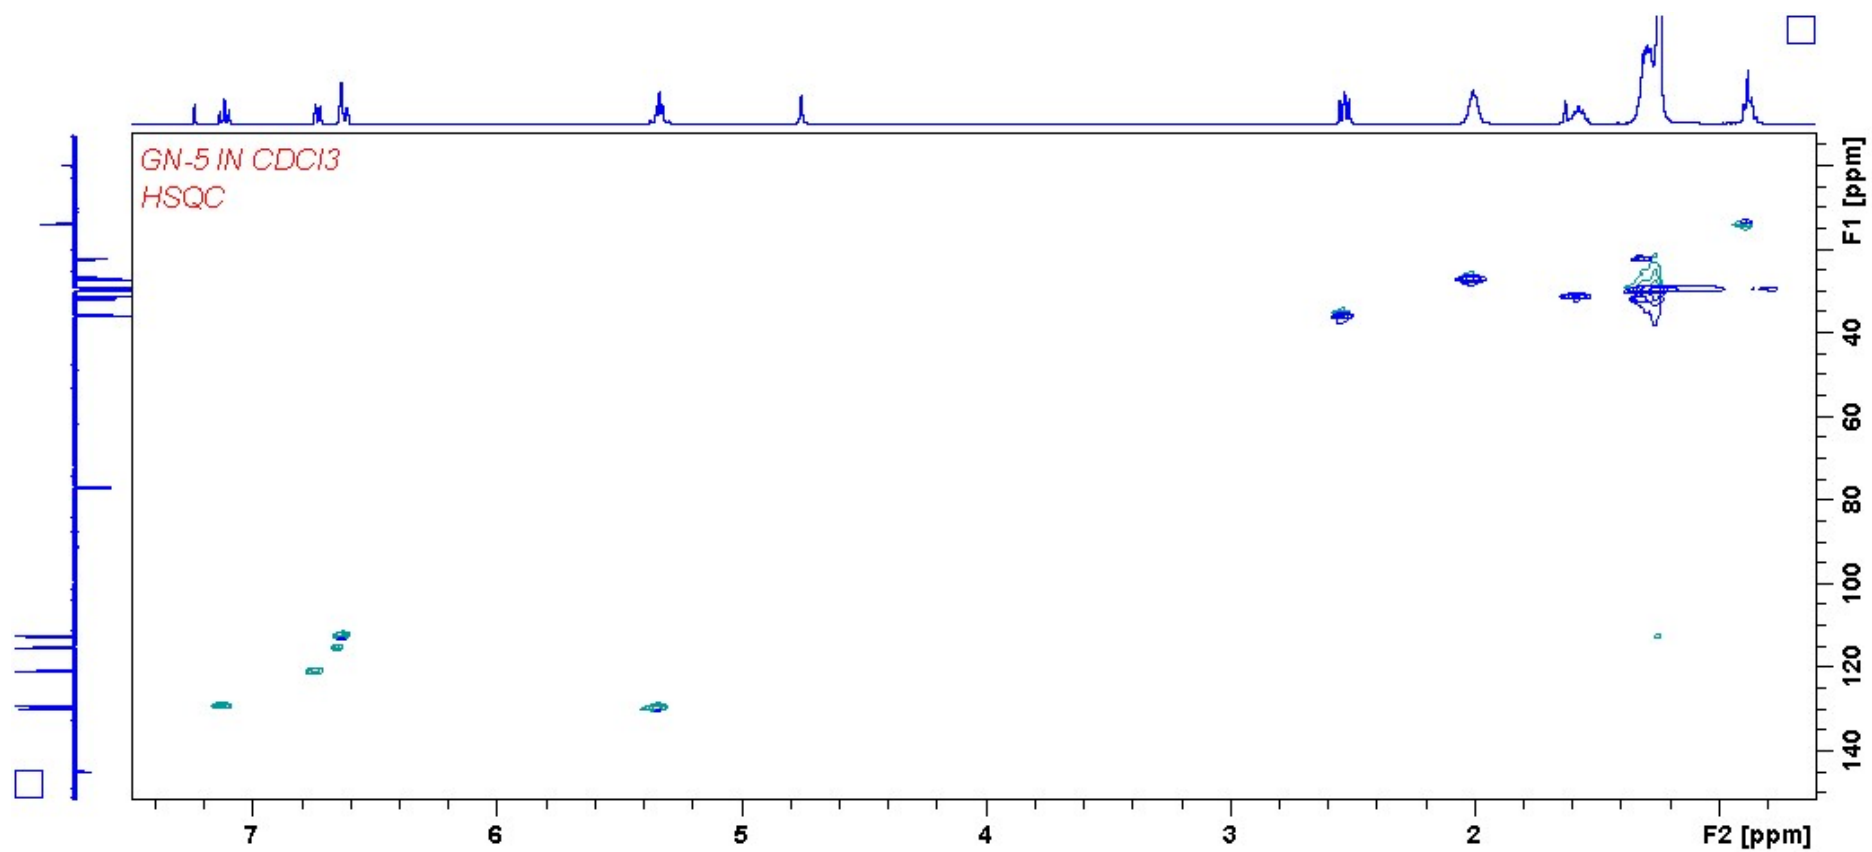

Figure S4. HSQC spectrum for 3-heptadec-12'-Z-enyl phenol (1)

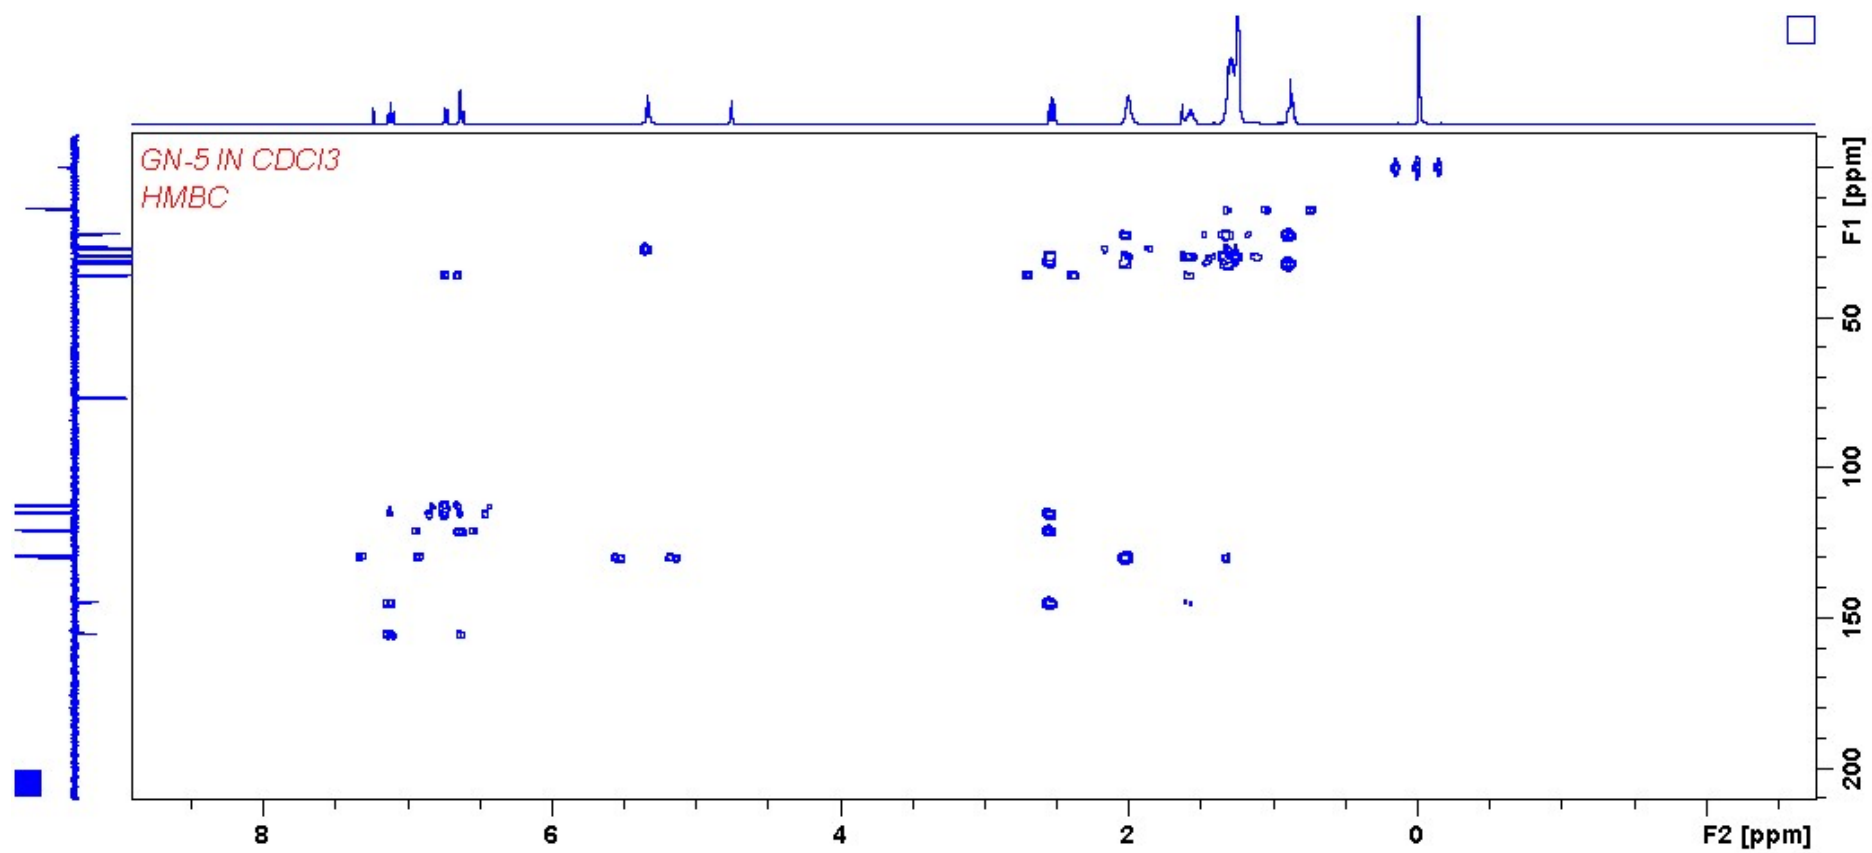

Figure S5. HMBC spectrum for 3-heptadec-12'-Z-enyl phenol (1)

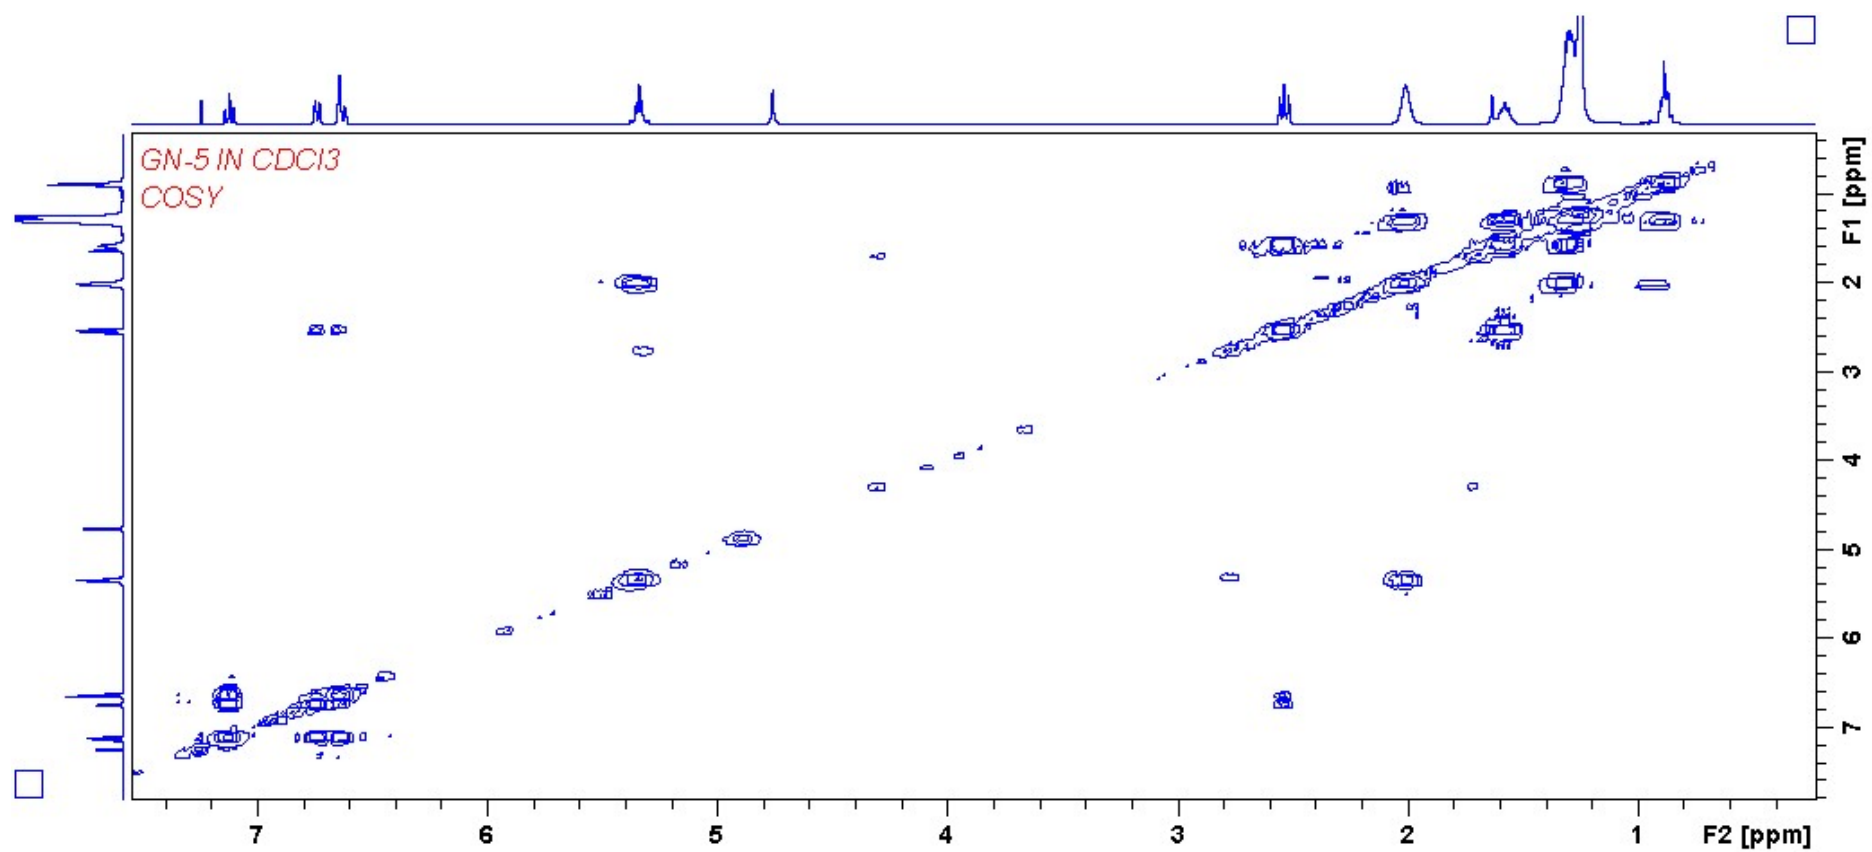

Figure S6. COSY spectrum for 3-heptadec-12'-Z-enyl phenol (1)

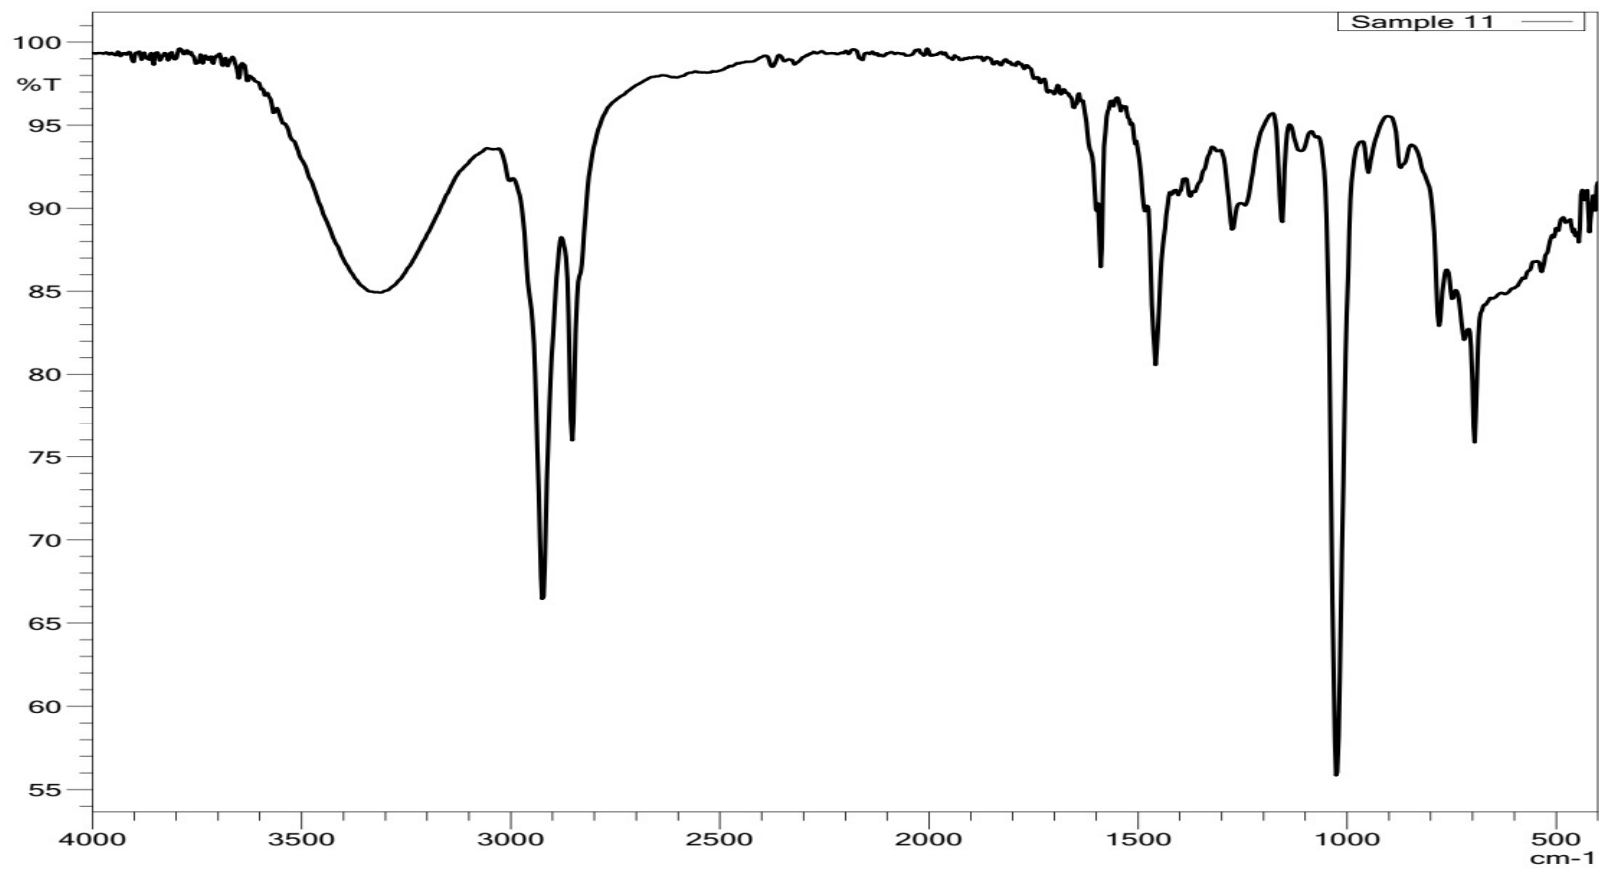

C:\LabSolutions\LabSolutionsIR\Data\Tebo Moswetsa\Sample 11.ispd

Figure S7. FTIR spectrum for 3-heptadec-12'-Z-enyl phenol (1)



## Elemental Composition Report

Page 1

### Single Mass Analysis

Tolerance = 10.0 mDa / DBE: min = -1.5, max = 100.0

Element prediction: Off

Number of isotope peaks used for i-FIT = 3

Monoisotopic Mass, Even Electron Ions

56 formula(e) evaluated with 1 results within limits (up to 10 best isotopic matches for each mass)

Elements Used:

C: 1-50 H: 1-100 O: 1-20

SYNAPT HDMS G1

Sola GN5 DCM 05 Aug 2021 UPLC #3b 678 (14.519)

1: TOF MS ES-  
1.87e+003

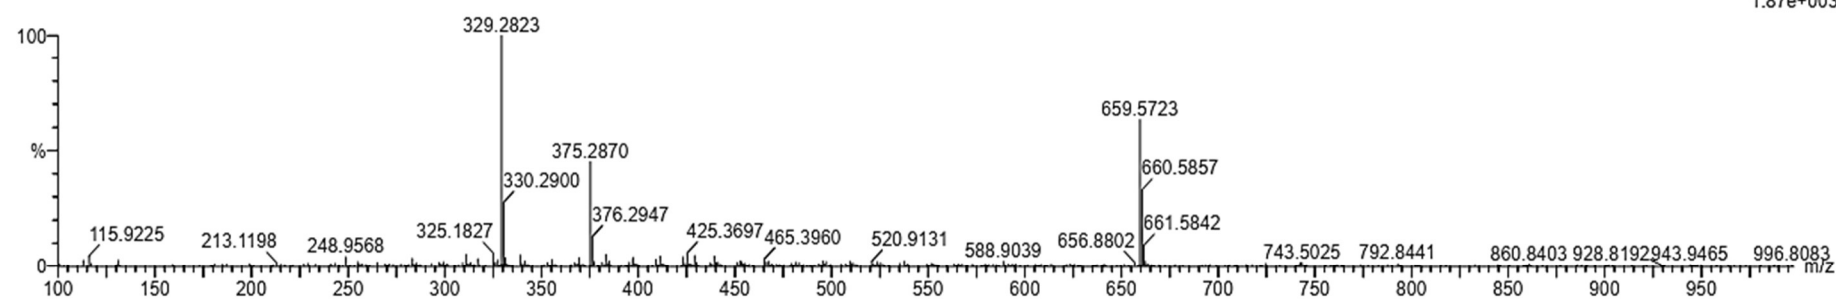

Minimum: -1.5  
Maximum: 10.0 10.0 100.0

| Mass     | Calc. Mass | mDa  | PPM  | DBE | i-FIT | i-FIT (Norm) | Formula   |
|----------|------------|------|------|-----|-------|--------------|-----------|
| 329.2823 | 329.2844   | -2.1 | -6.4 | 5.5 | 43.4  | 0.0          | C23 H37 O |

Figure S8. HR-ESI-MS for 3-heptadec-12'-Z-enyl phenol (1)

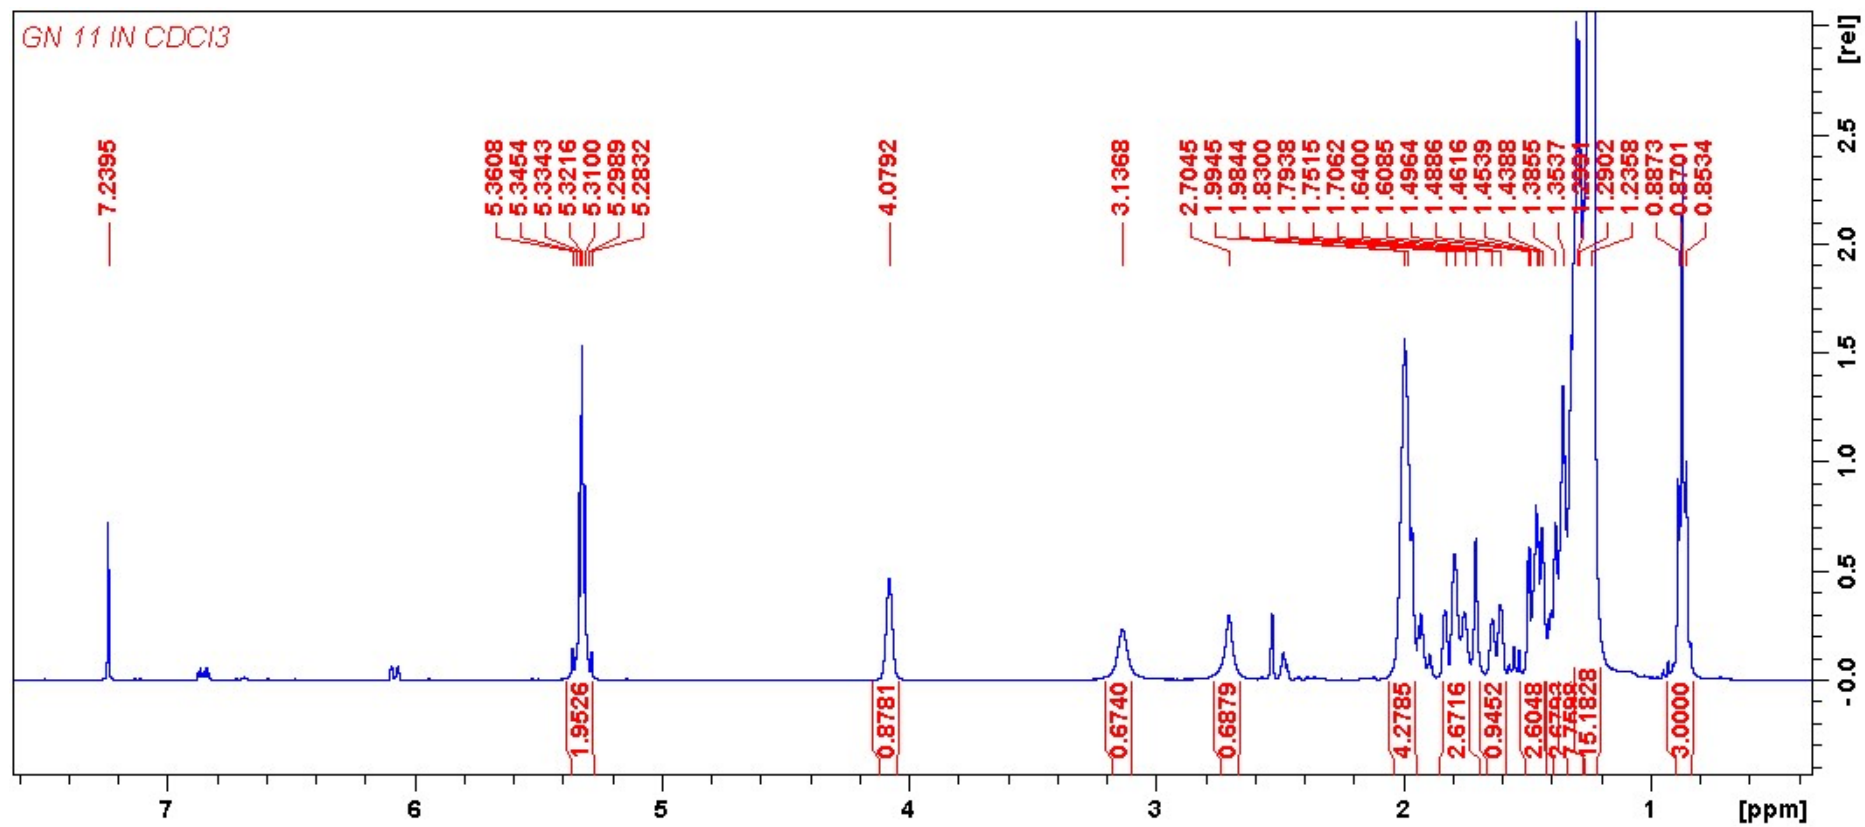

Figure S9. <sup>1</sup>H NMR spectrum for (1*R*,3*R*)-1,3-dihydroxy-3-[heptadec-12'(Z)-enyl]cyclohexane (**2**)

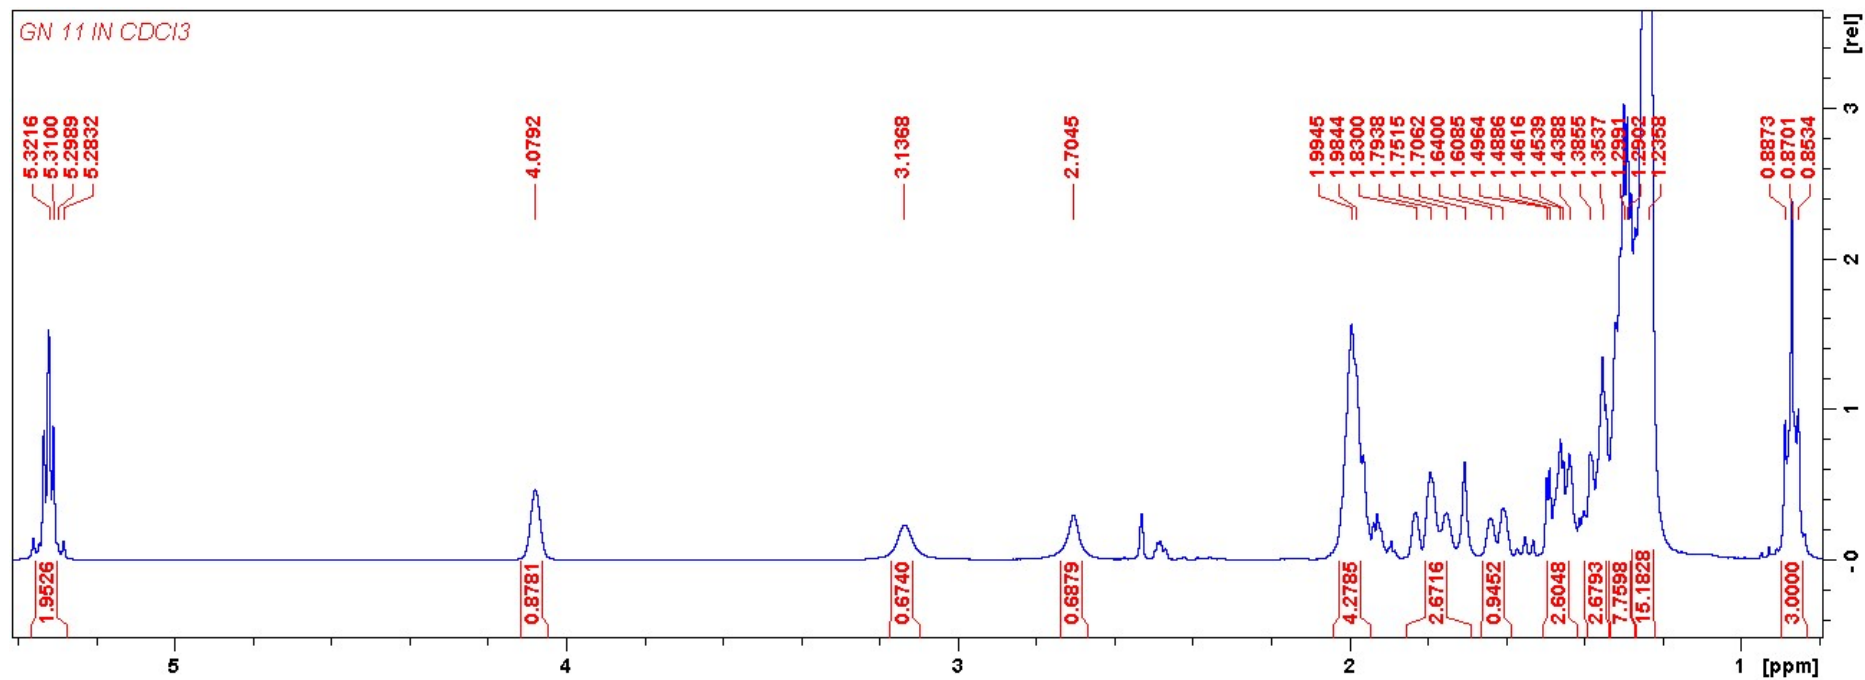

Figure S10. Expanded <sup>1</sup>H NMR spectrum for (1*R*,3*R*)-1,3-dihydroxy-3-[heptadec-12'(*Z*)-enyl]cyclohexane (2)

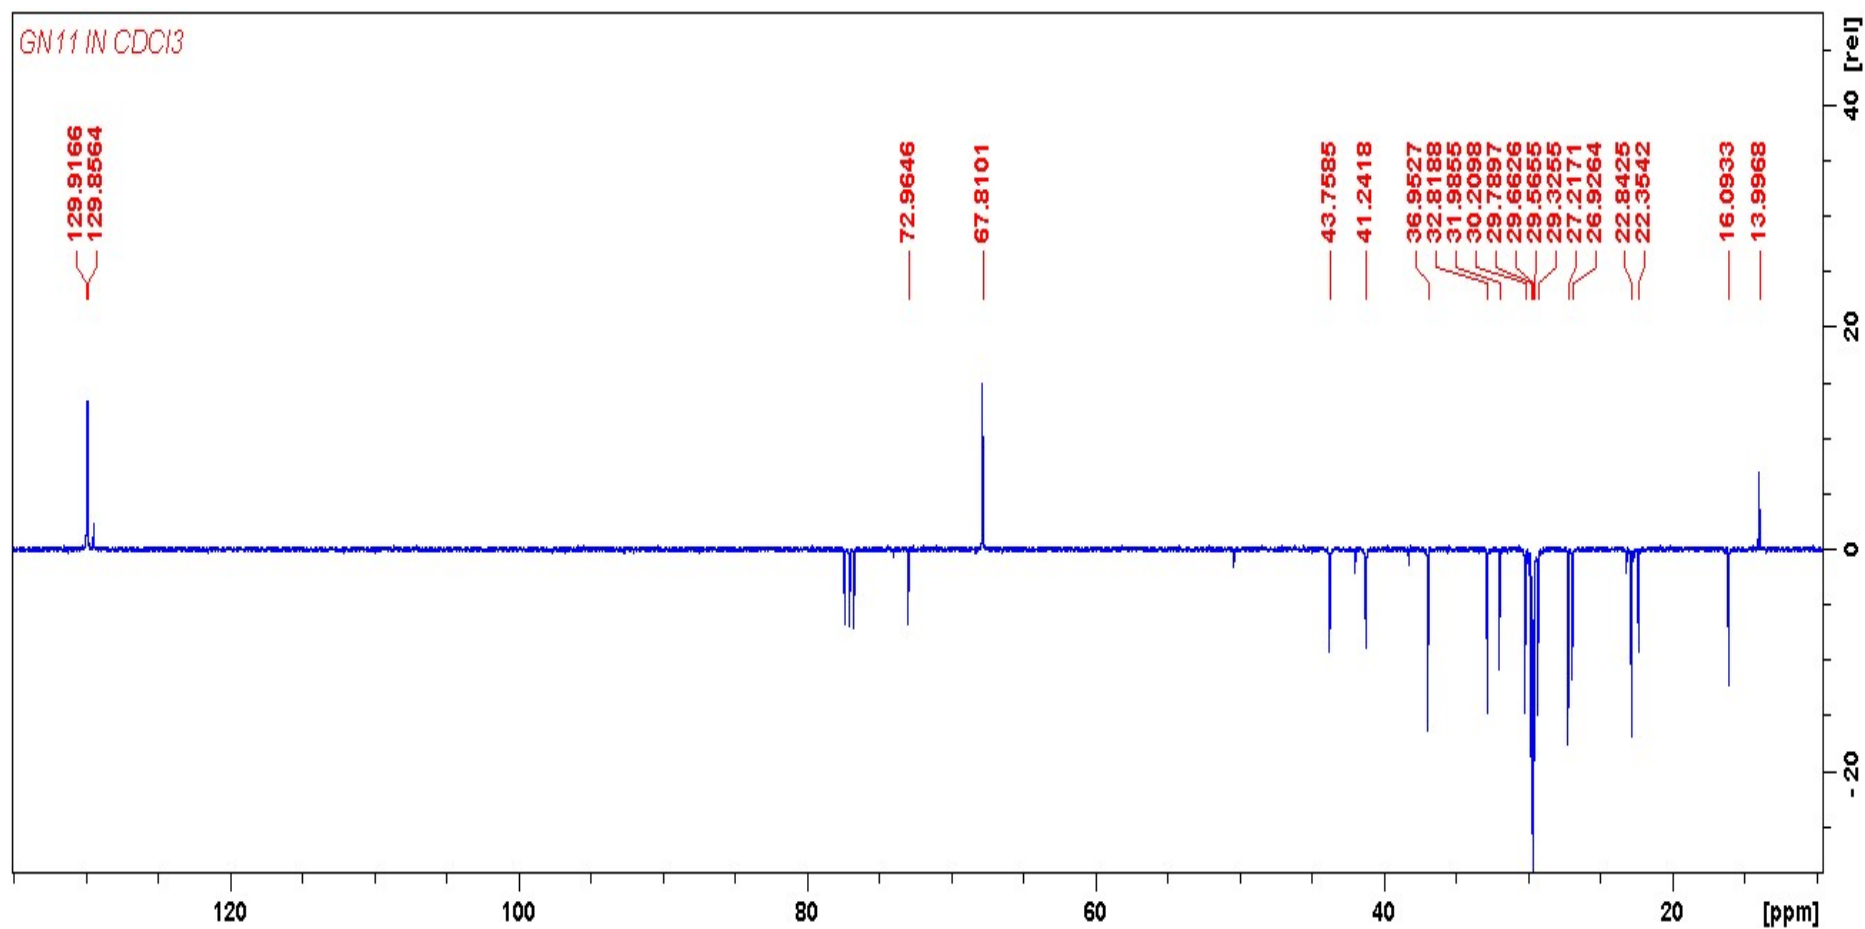

Figure S11. APT spectrum for (1*R*,3*R*)-1,3-dihydroxy-3-[heptadec-12'(Z)-enyl]cyclohexane (2)

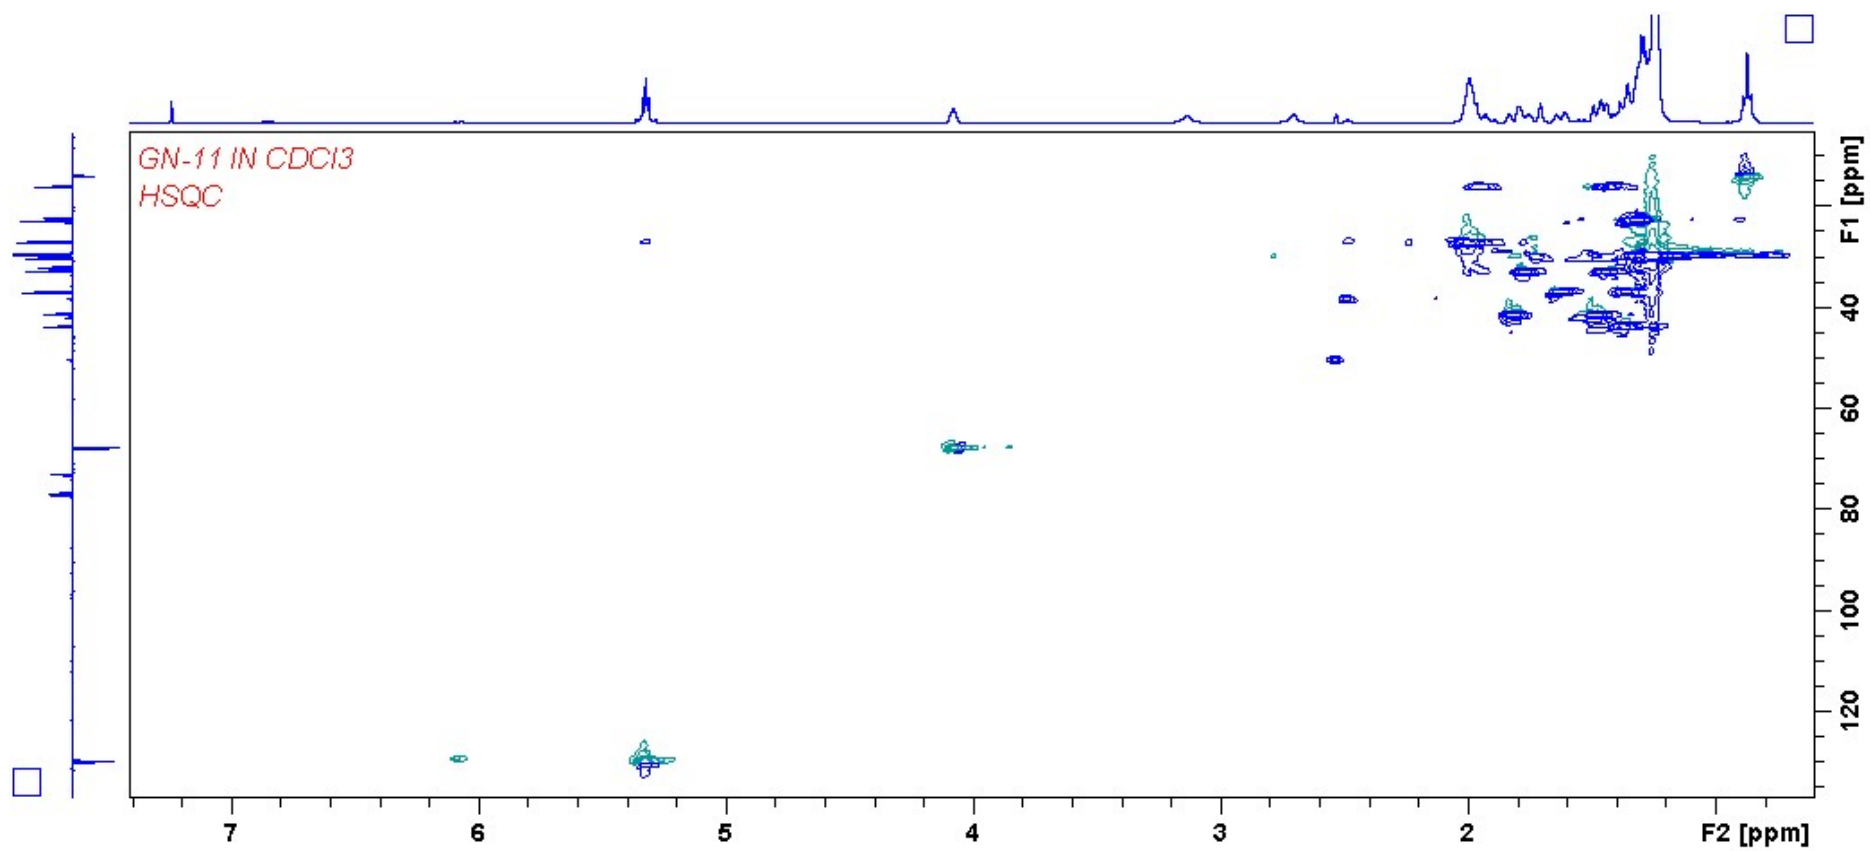

Figure S12. HSQC spectrum for (1*R*,3*R*)-1,3-dihydroxy-3-[heptadec-12'(Z)-enyl]cyclohexane (**2**)

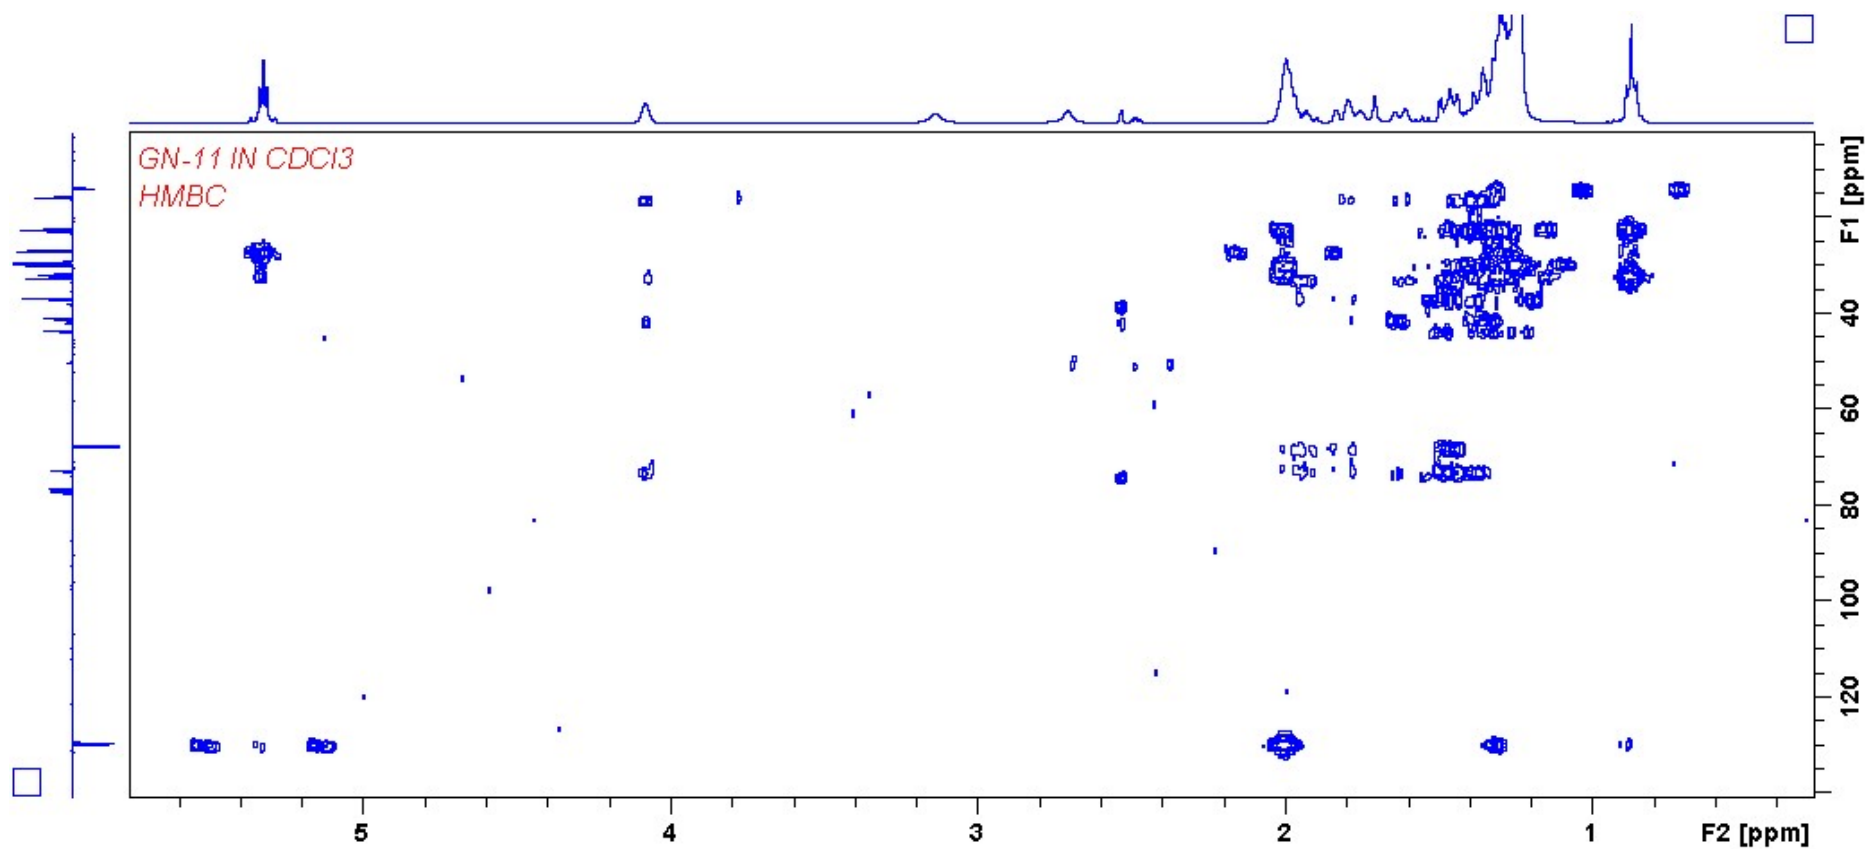

Figure S13. HMBC spectrum for (1*R*,3*R*)-1,3-dihydroxy-3-[heptadec-12'(*Z*)-enyl]cyclohexane (2)

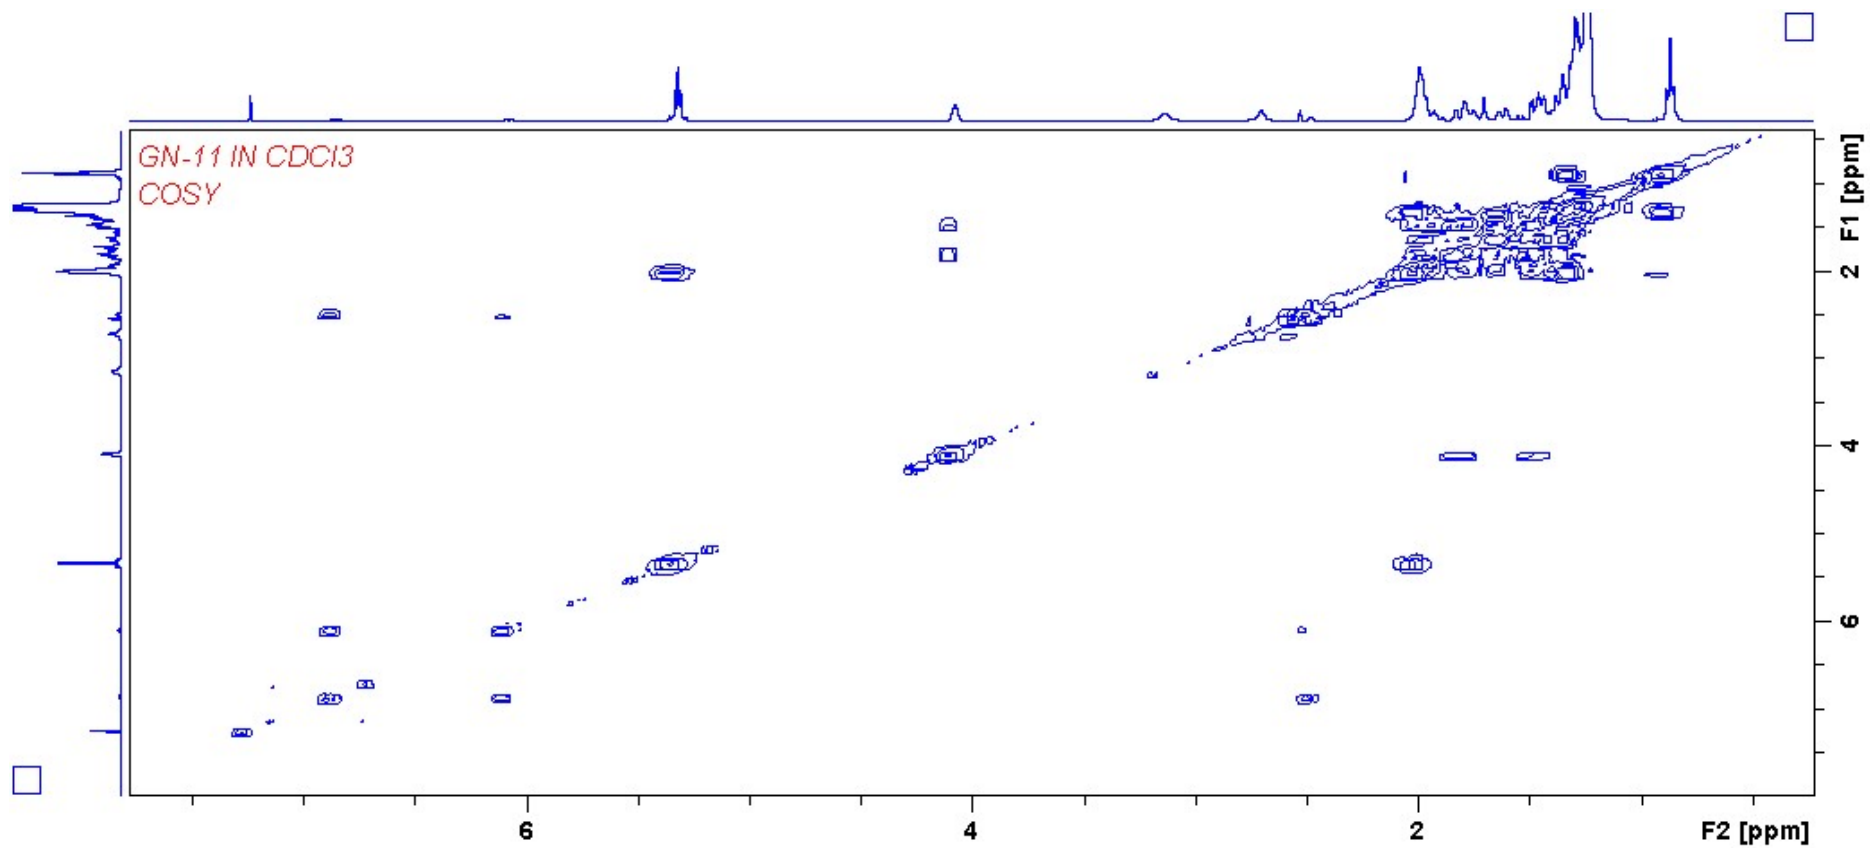

Figure S14. COSY spectrum for (1R,3R)-1,3-dihydroxy-3-[heptadec-12'(Z)-enyl]cyclohexane (2)

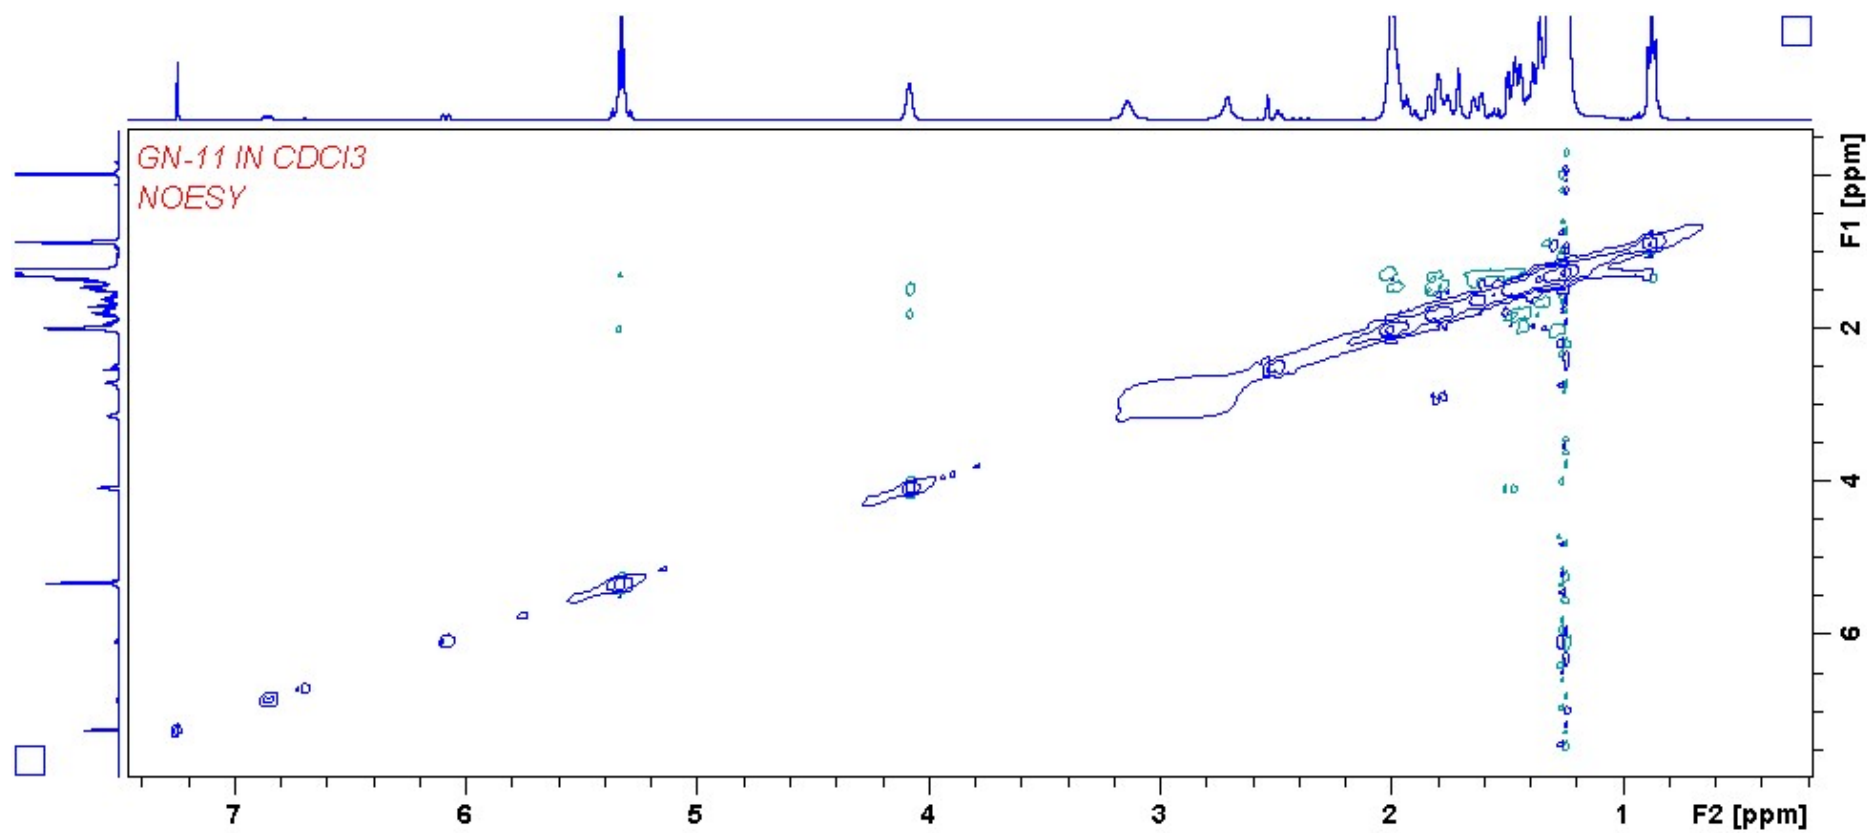

Figure S15. NOESY spectrum for (1*R*,3*R*)-1,3-dihydroxy-3-[heptadec-12'(Z)-enyl]cyclohexane (**2**)



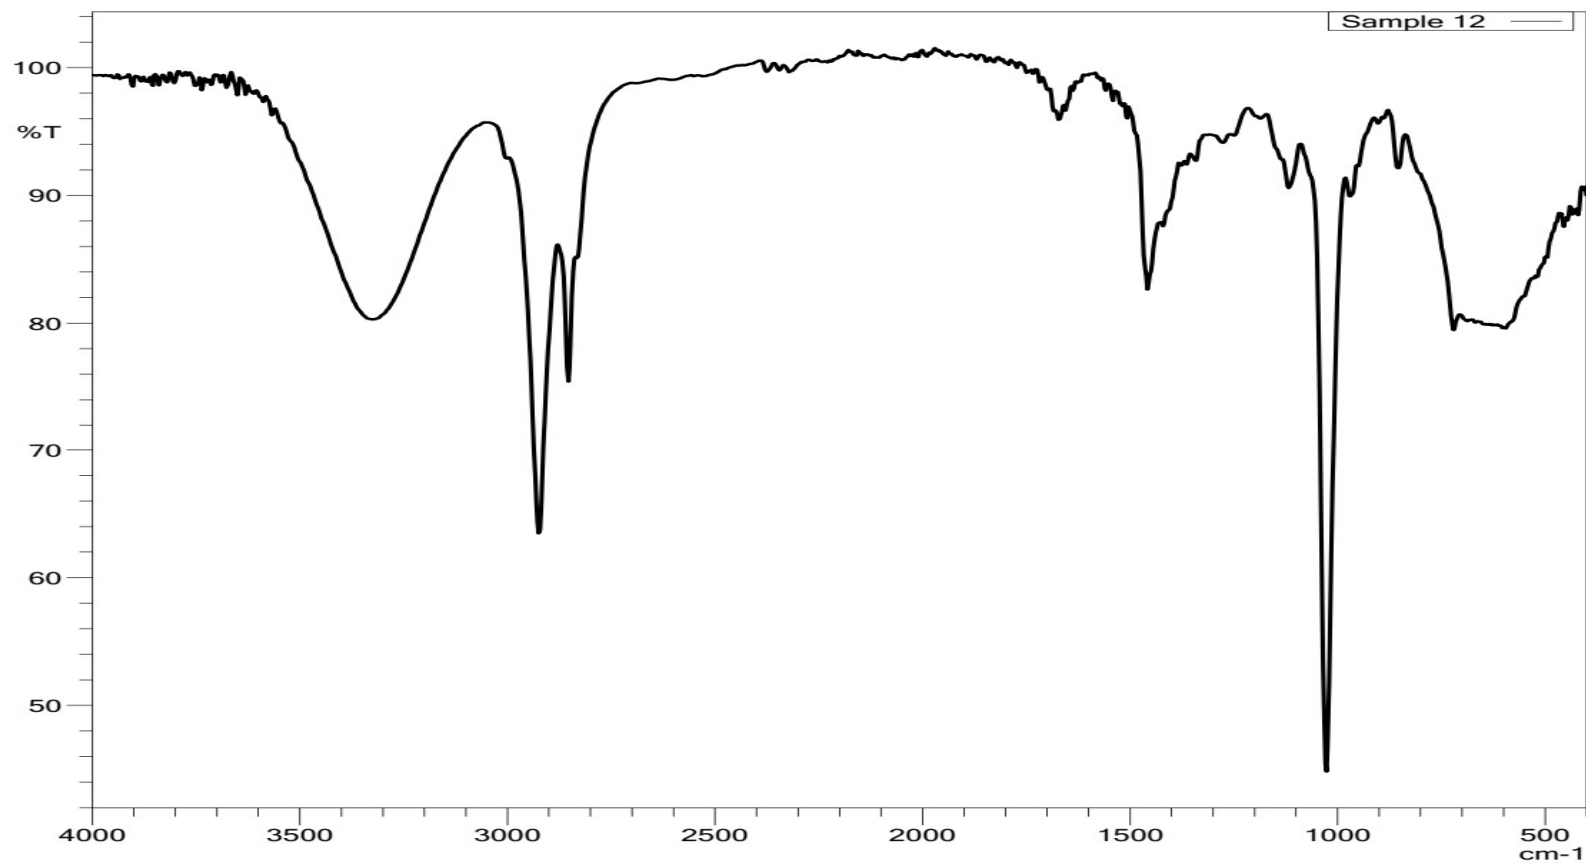

C:\LabSolutions\LabSolutionsIR\Data\Tebo Moswetsa\Sample 12.ispd

Figure S16. FTIR spectrum for (1R,3R)-1,3-dihydroxy-3-[heptadec-12'(Z)-enyl]cyclohexane (2)

## Elemental Composition Report

Page 1

### Single Mass Analysis

Tolerance = 10.0 mDa / DBE: min = -1.5, max = 100.0

Element prediction: Off

Number of isotope peaks used for i-FIT = 3

Monoisotopic Mass, Even Electron Ions

18 formula(e) evaluated with 2 results within limits (up to 10 best isotopic matches for each mass)

Elements Used:

C: 1-40 H: 1-100 O: 1-2 Na: 0-1

Sola GN11 DCM 05 Aug 2021 UPLC #3a 666 (13.801)

SYNAPT HDMS G1

1: TOF MS ES+  
2.05e+004

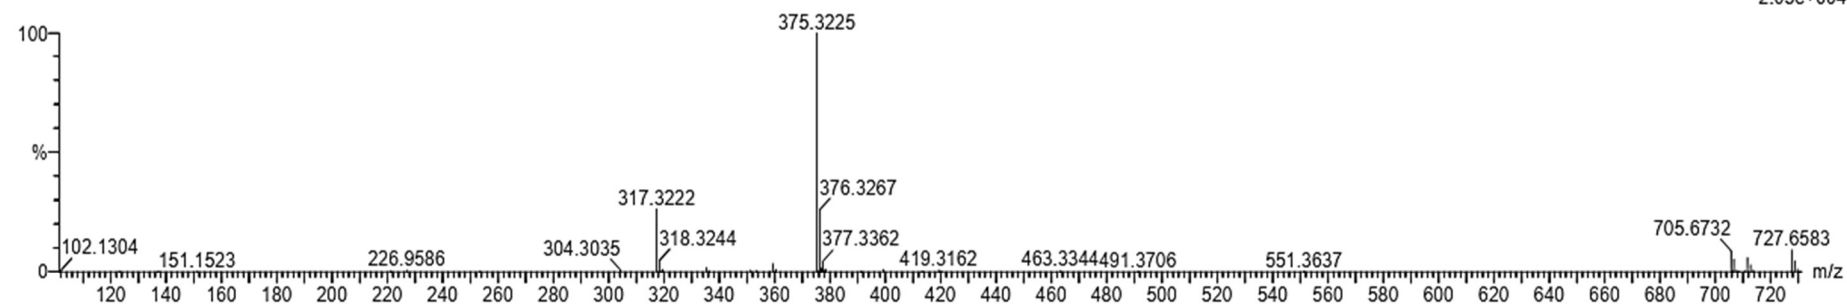

Minimum: -1.5  
Maximum: 10.0 10.0 100.0

| Mass     | Calc. Mass | mDa  | PPM  | DBE | i-FIT | i-FIT (Norm) | Formula       |
|----------|------------|------|------|-----|-------|--------------|---------------|
| 375.3225 | 375.3239   | -1.4 | -3.7 | 1.5 | 102.8 | 0.0          | C23 H44 O2 Na |

Figure S17. HR-ESI-MS for (1R,3R)-1,3-dihydroxy-3-[heptadec-12'(Z)-enyl]cyclohexane (2)

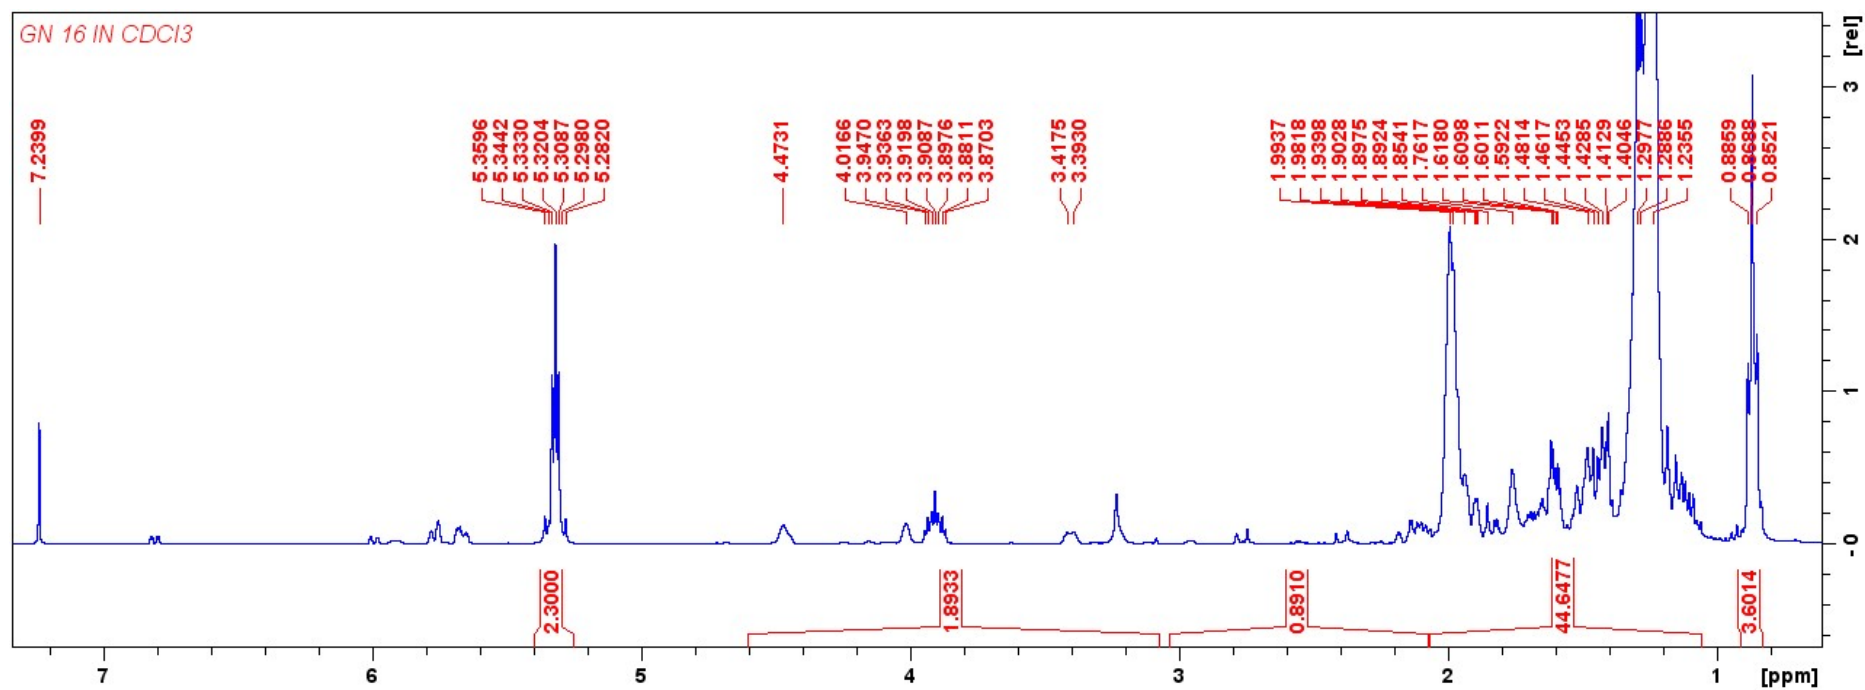

Figure S18. <sup>1</sup>H NMR spectrum for (1*S*,2*S*,3*S*,4*S*,5*R*)-1,2,3,4,5-pentahydroxy-5-[octadec-13'(*Z*)-enyl]cyclohexane (**3**)

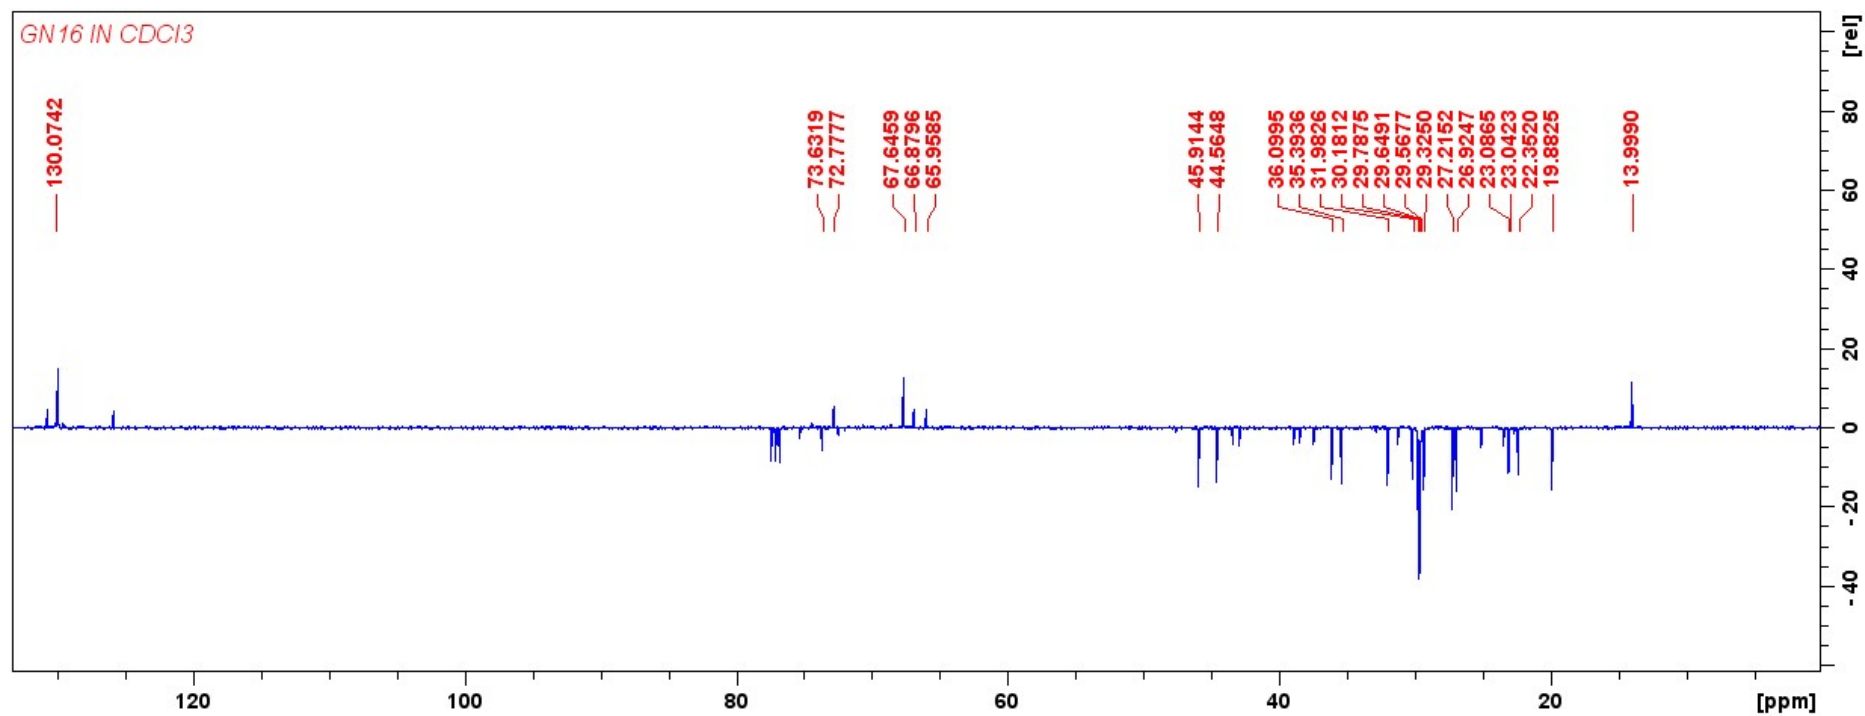

Figure S19. APT spectrum for (1*S*,2*S*,3*S*,4*S*,5*R*)-1,2,3,4,5-pentahydroxy-5-[octadec-13'(*Z*)-enyl]cyclohexane (**3**)

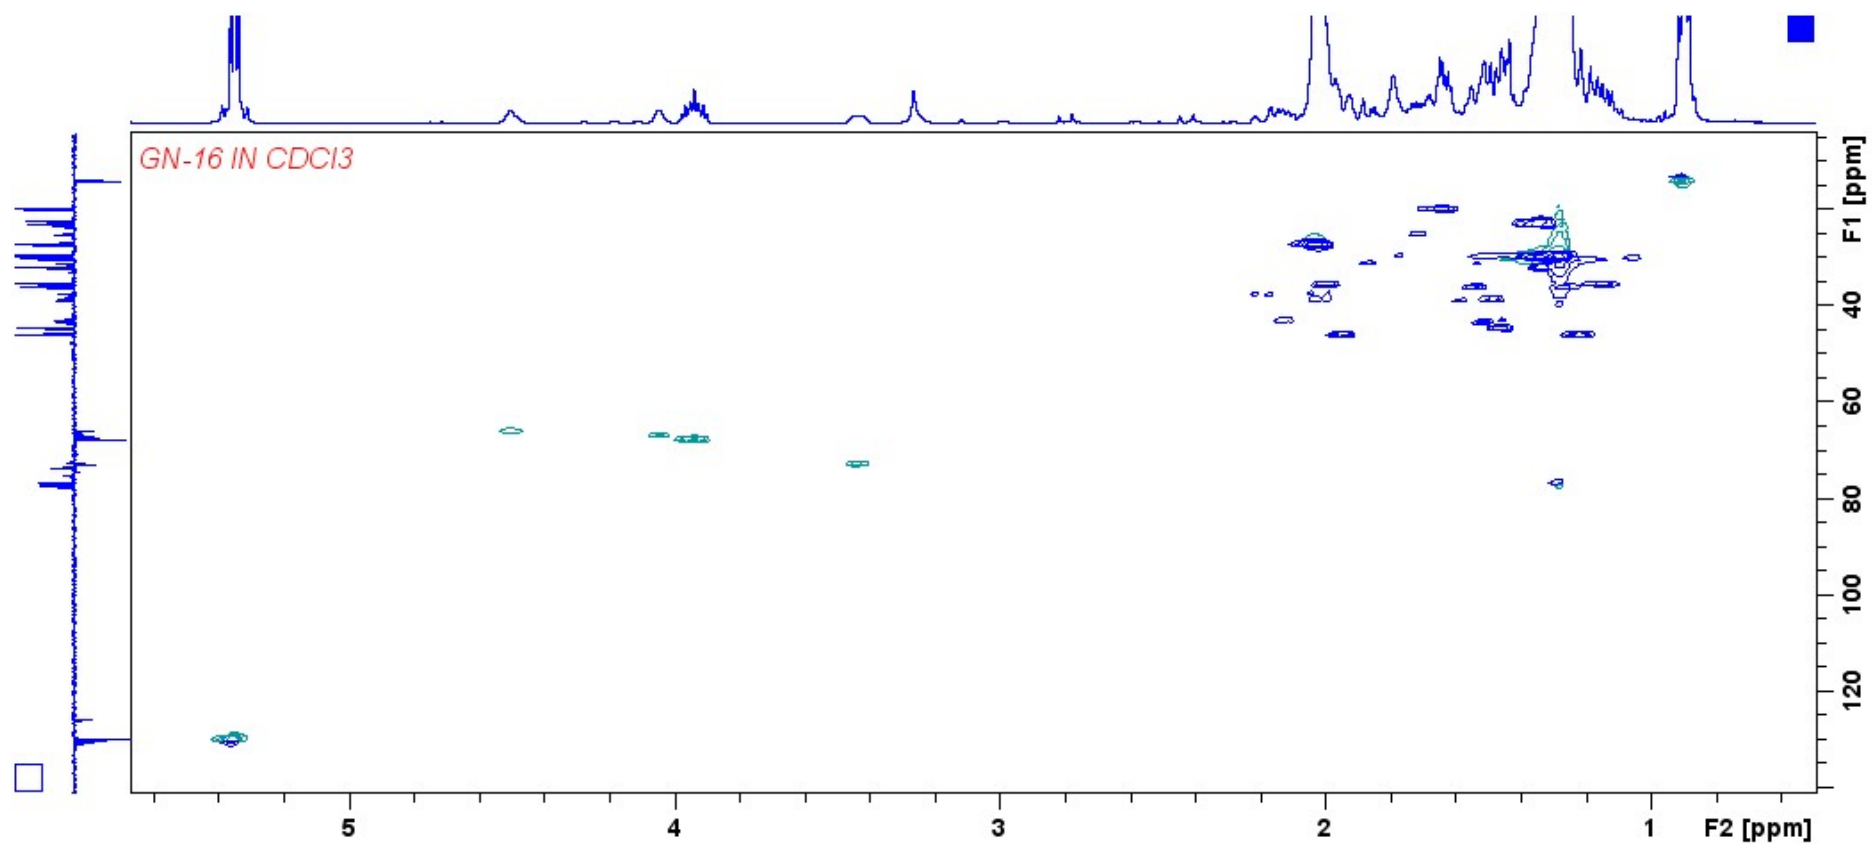

Figure S20. HSQC spectrum for (1*S*,2*S*,3*S*,4*S*,5*R*)-1,2,3,4,5-pentahydroxy-5-[octadec-13'(*Z*)-enyl]cyclohexane (**3**)

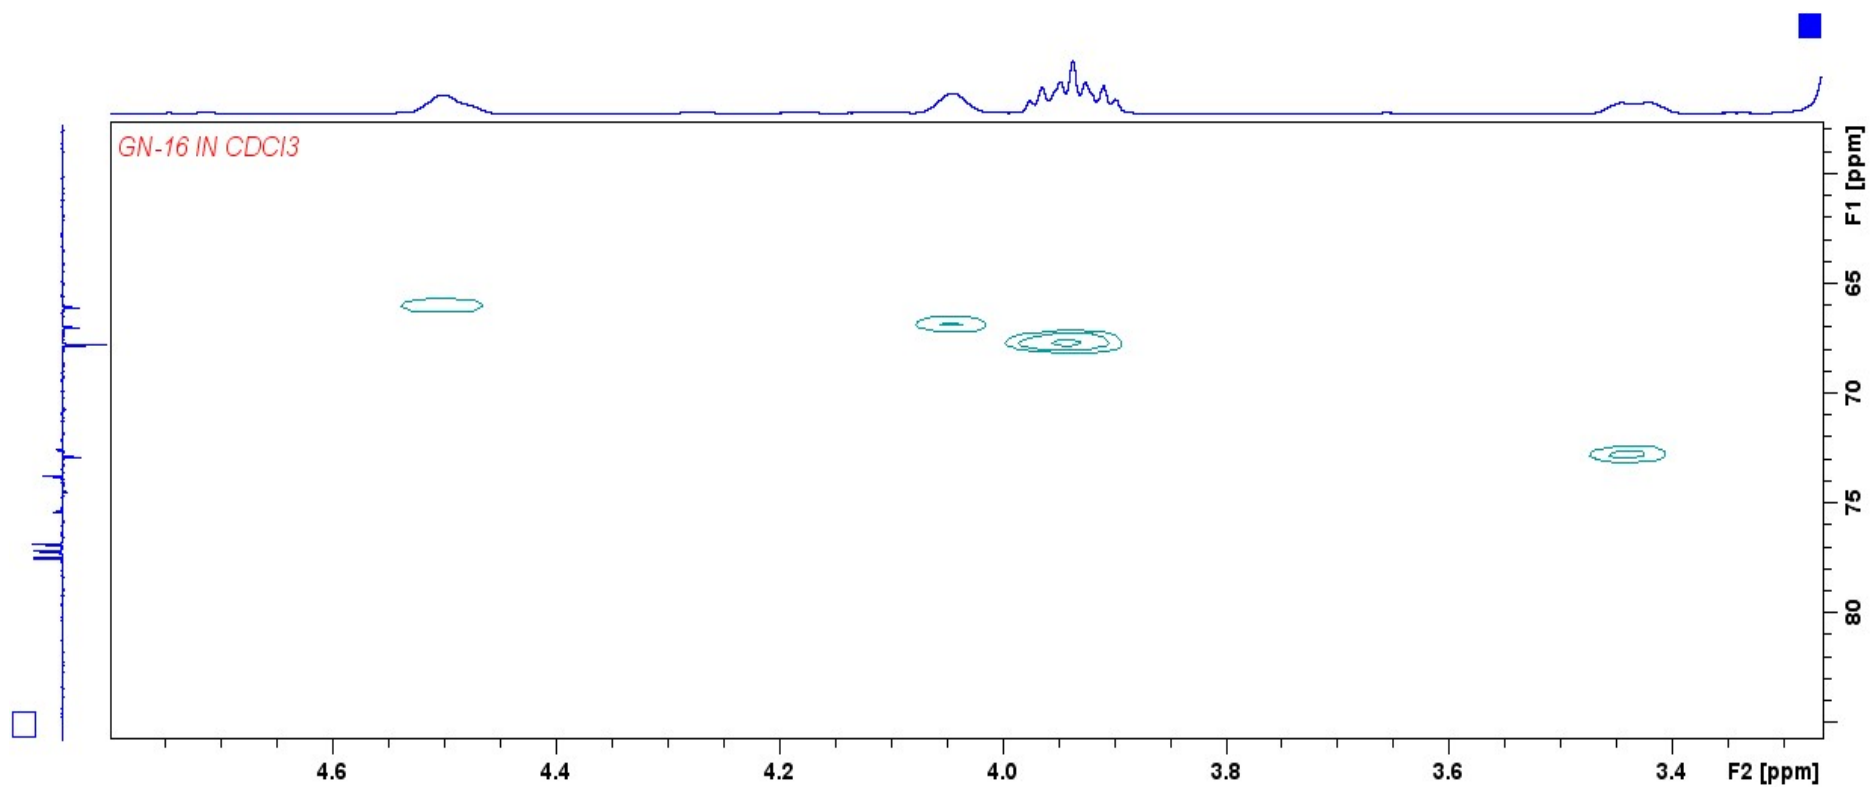

Figure S21. Expanded HSQC for (1*S*,2*S*,3*S*,4*S*,5*R*)-1,2,3,4,5-pentahydroxy-5-[octadec-13'(*Z*)-enyl]cyclohexane (**3**)

(The weak <sup>1</sup>H NMR resonances of the oxygenated methine protons necessitated the expansion to clarify their correlations with their respective carbons)

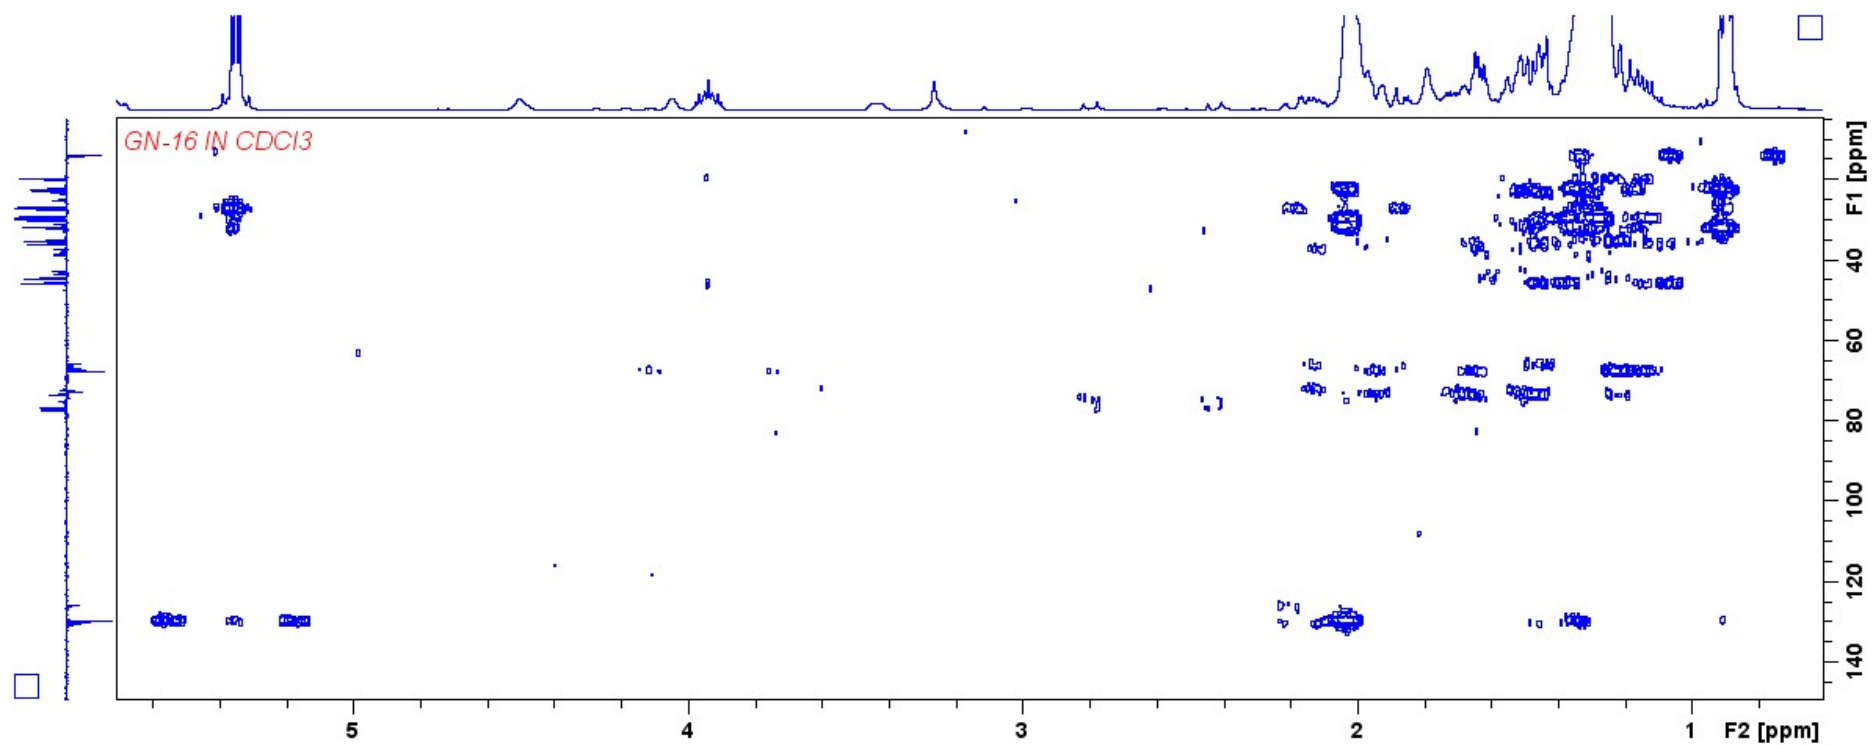

Figure S22. HMBC spectrum for (1*S*,2*S*,3*S*,4*S*,5*R*)-1,2,3,4,5-pentahydroxy-5-[octadec-13'(Z)-enyl]cyclohexane (3)

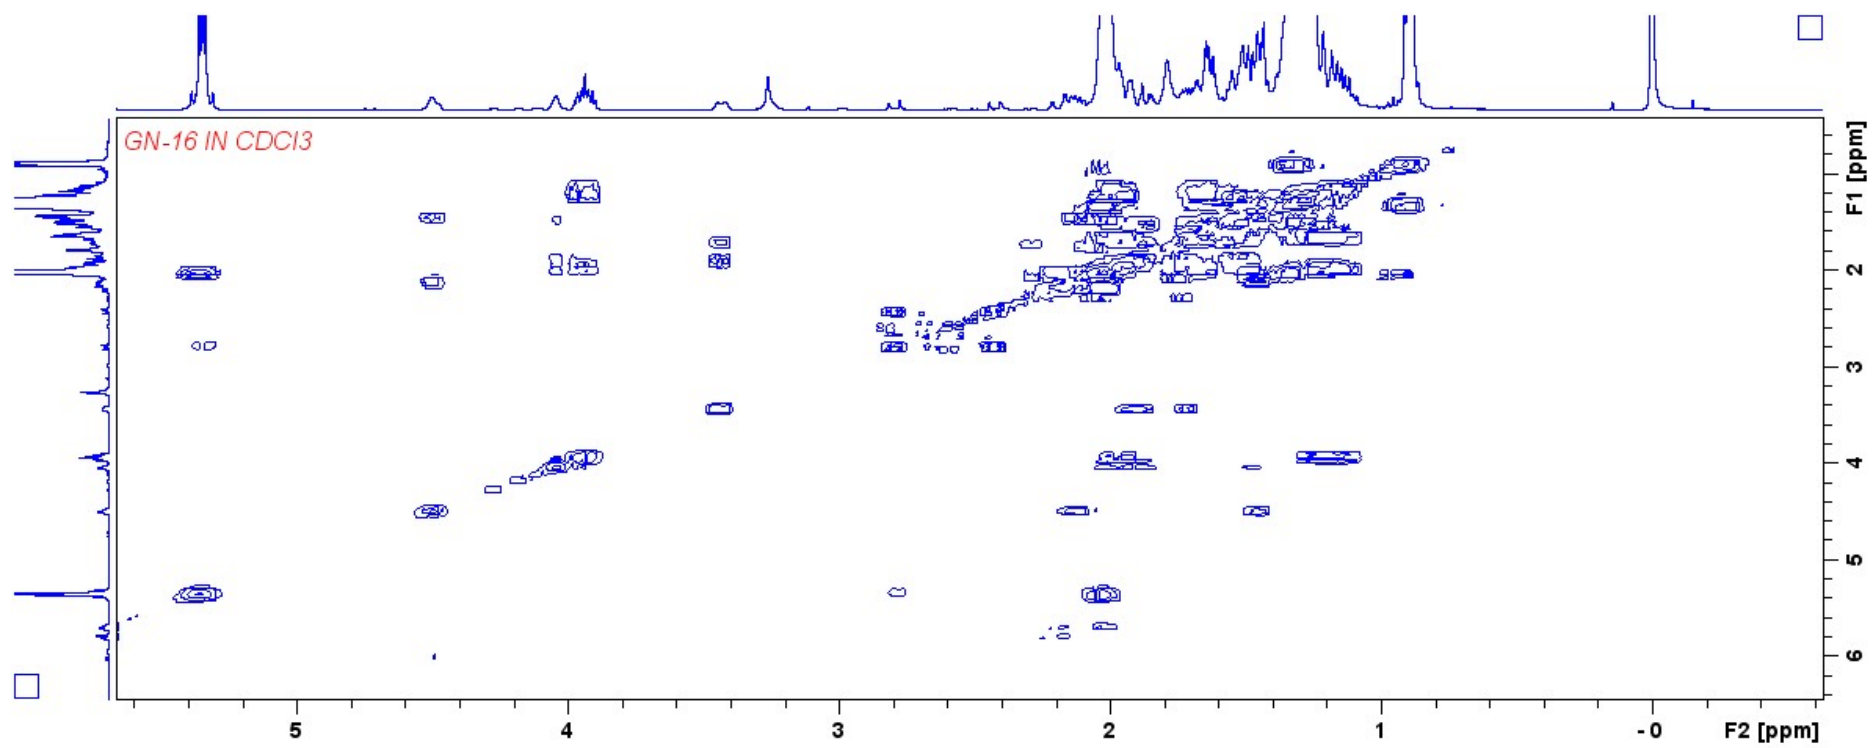

Figure S23. COSY spectrum for (1*S*,2*S*,3*S*,4*S*,5*R*)-1,2,3,4,5-pentahydroxy-5-[octadec-13'(Z)-enyl]cyclohexane (**3**)



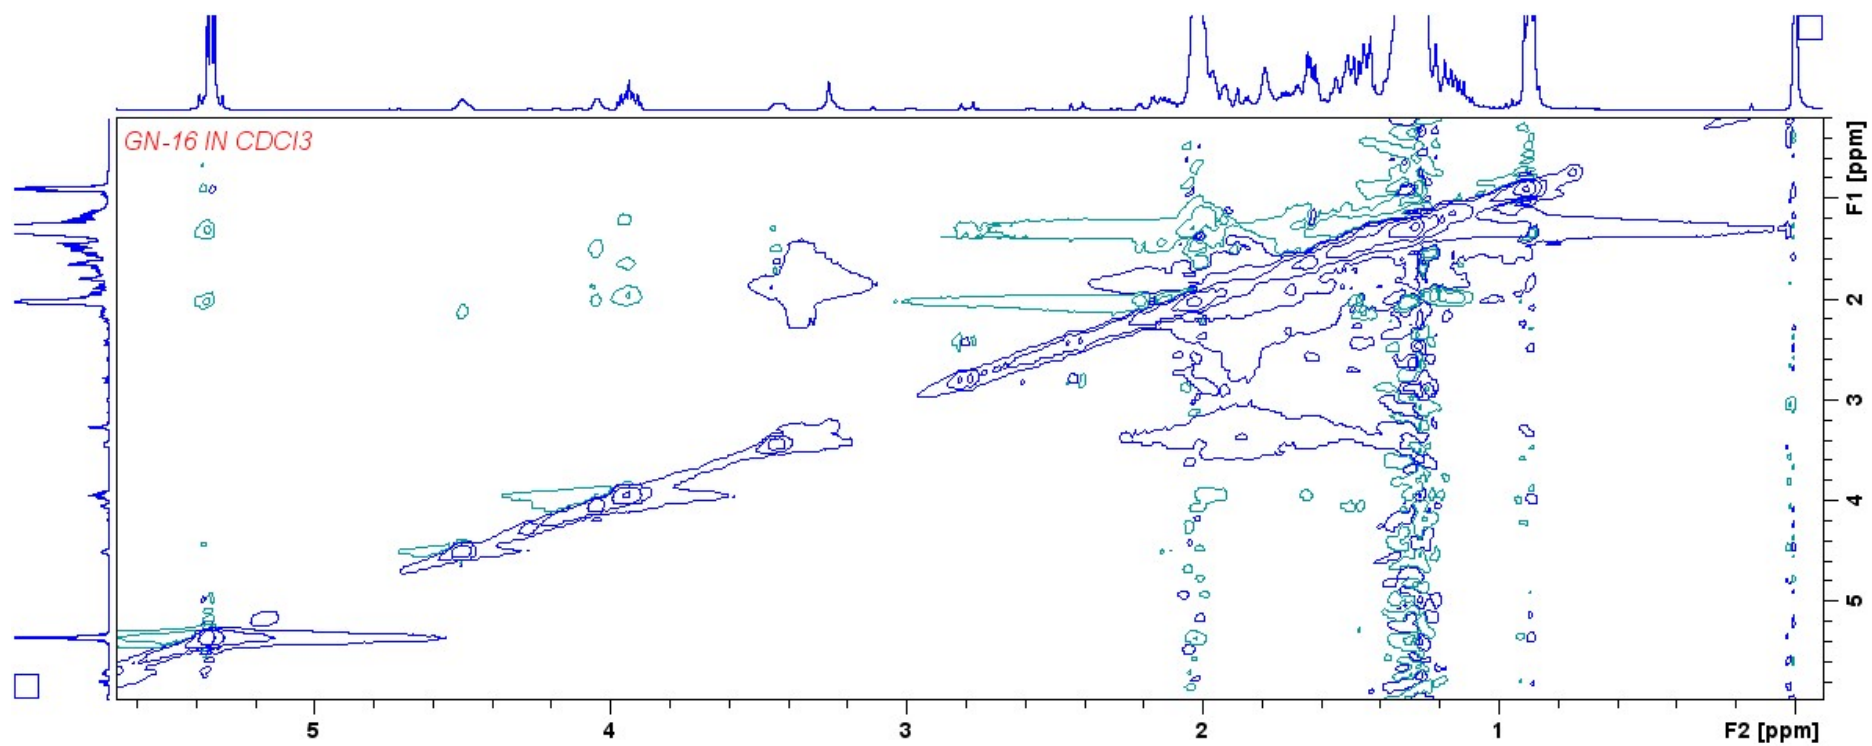

Figure S24. NOESY spectrum for (1S,2S,3S,4S,5R)-1,2,3,4,5-pentahydroxy-5-[octadec-13'(Z)-enyl]cyclohexane (3)

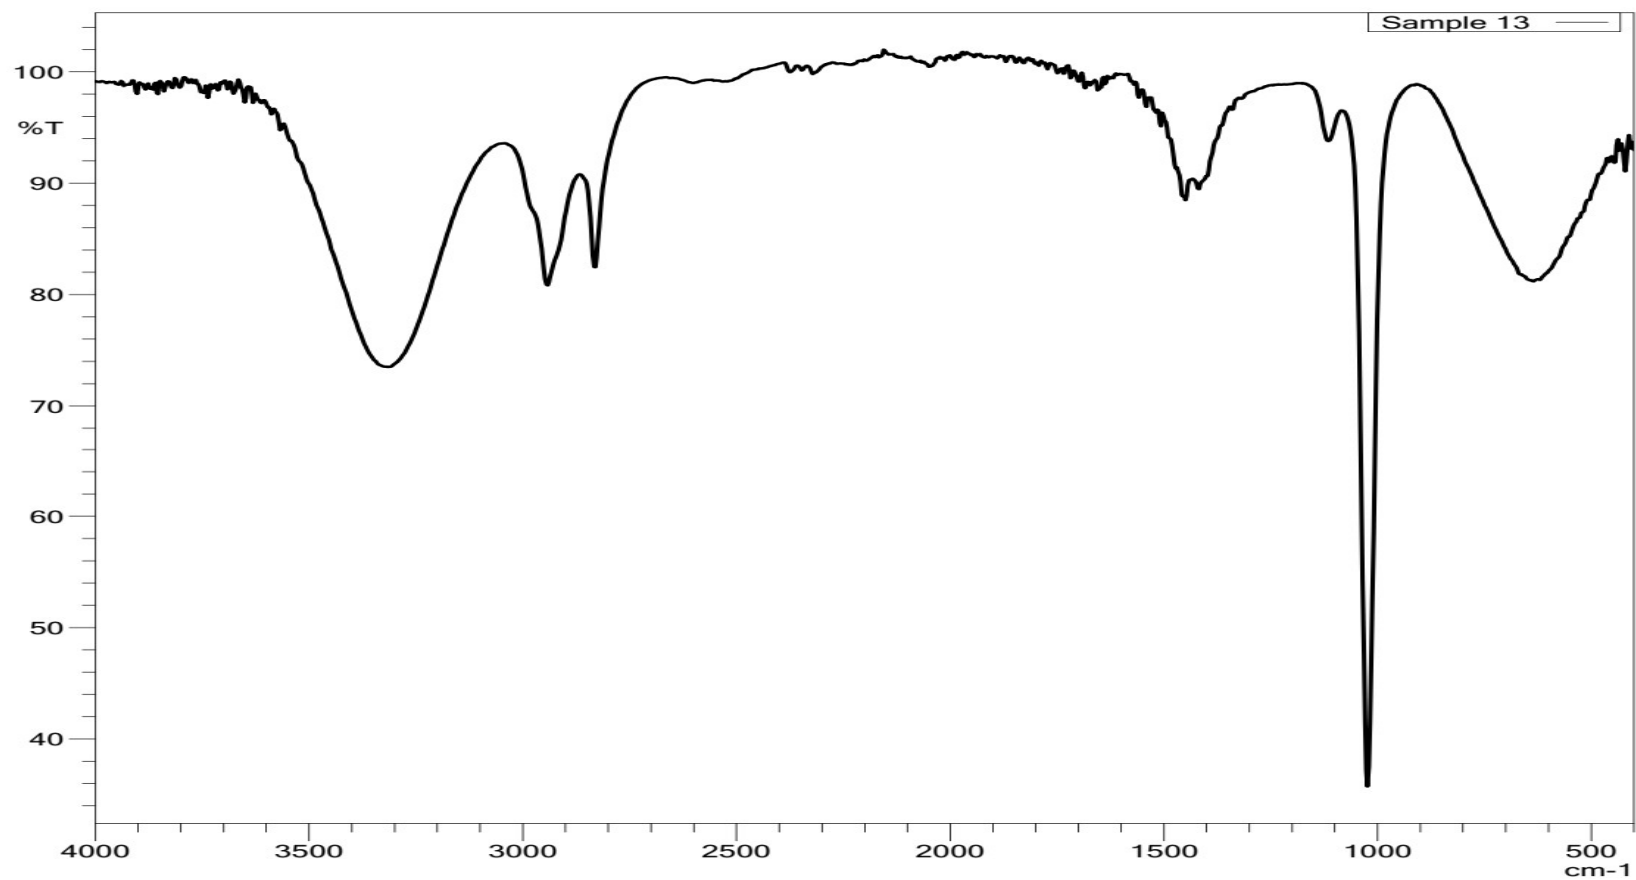

C:\LabSolutions\LabSolutionsIR\Data\Tebo Moswetsa\Sample 13.ispd

Figure S25. FTIR spectrum for (1*S*,2*S*,3*S*,4*S*,5*R*)-1,2,3,4,5-pentahydroxy-5-[octadec-13'(Z)-enyl]cyclohexane (3)

## Elemental Composition Report

Page 1

### Single Mass Analysis

Tolerance = 10.0 mDa / DBE: min = -1.5, max = 100.0

Element prediction: Off

Number of isotope peaks used for i-FIT = 3

Monoisotopic Mass, Even Electron Ions

26 formula(e) evaluated with 1 results within limits (up to 10 best isotopic matches for each mass)

Elements Used:

C: 1-40 H: 1-100 O: 1-5

Sola GN16 DCM 05 Aug 2021 UPLC #3b 612 (13.104)

SYNAPT HDMS G1

1: TOF MS ES-  
6.39e+003

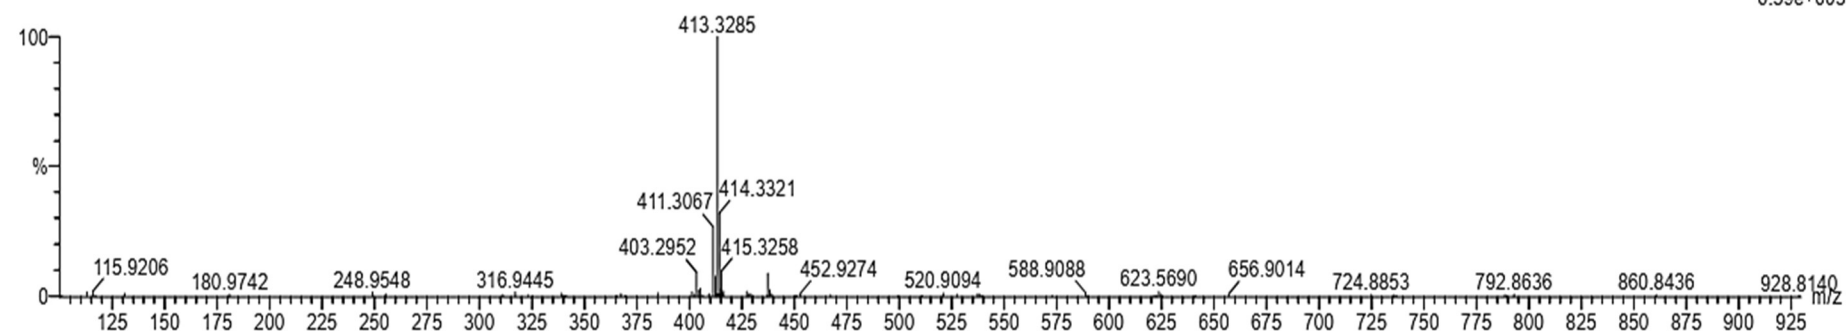

Minimum: -1.5  
Maximum: 10.0 10.0 100.0

| Mass     | Calc. Mass | mDa | PPM | DBE | i-FIT | i-FIT (Norm) | Formula    |
|----------|------------|-----|-----|-----|-------|--------------|------------|
| 413.3285 | 413.3267   | 1.8 | 4.4 | 2.5 | 84.8  | 0.0          | C24 H45 O5 |

Figure S26. HR-ESI-MS for (1*S*,2*S*,3*S*,4*S*,5*R*)-1,2,3,4,5-pentahydroxy-5-[octadec-13'(*Z*)-enyl]cyclohexane (**3**)

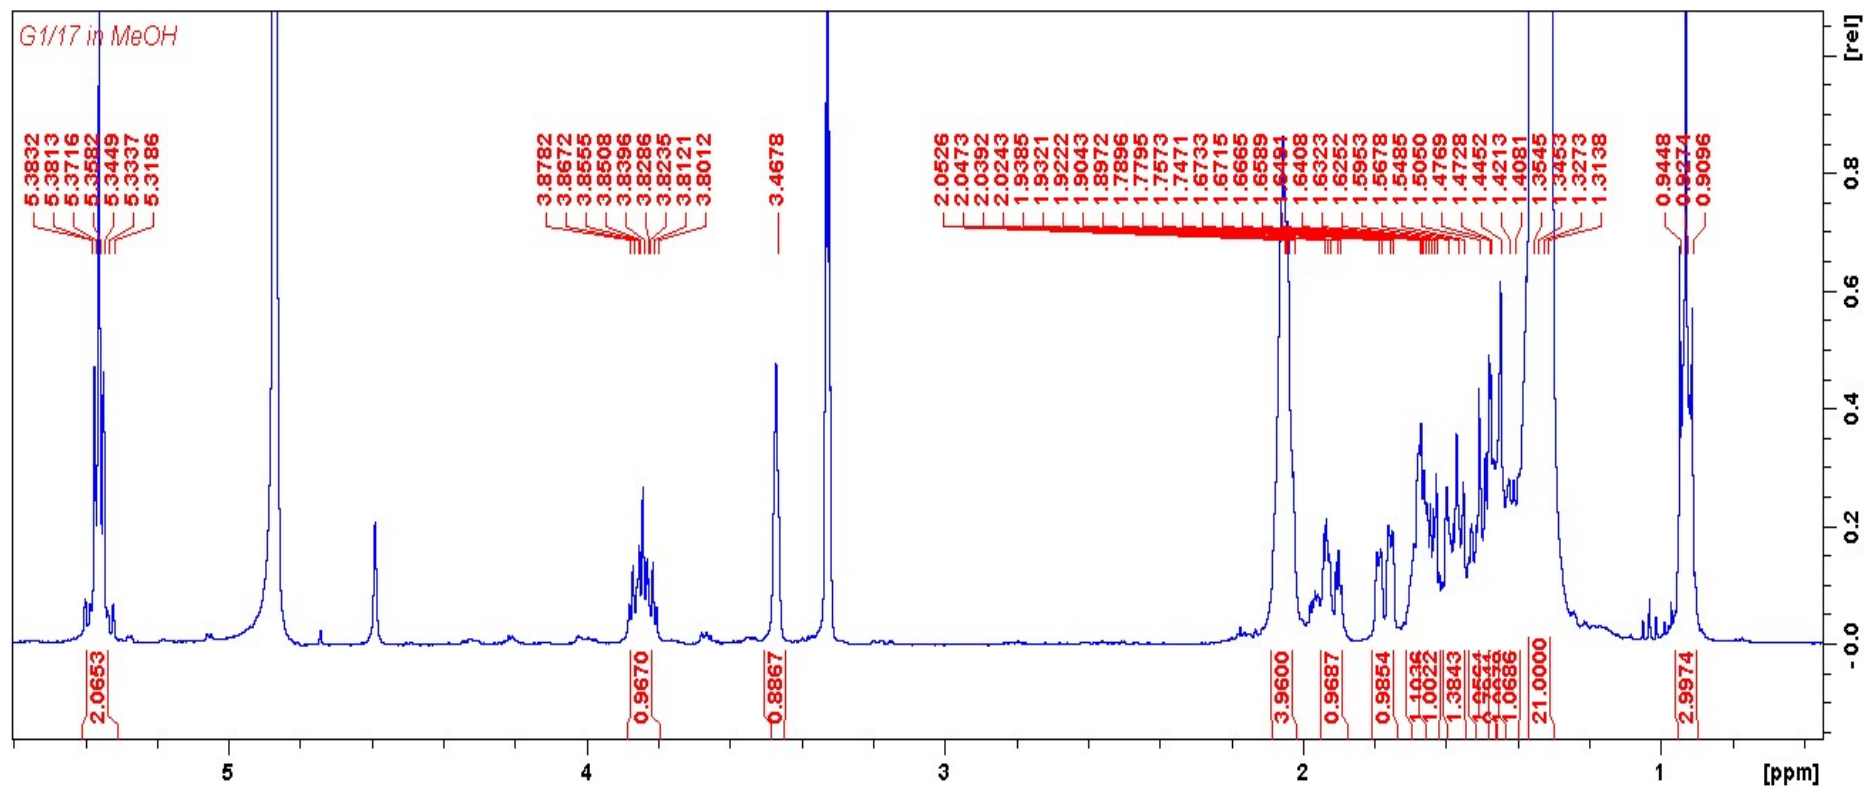

Figure S27.  $^1\text{H}$ -NMR spectrum for (1*R*,2*S*,4*R*)-1,2,4-trihydroxy-4-[heptadec-12'(Z)-enyl]cyclohexane (**4**)

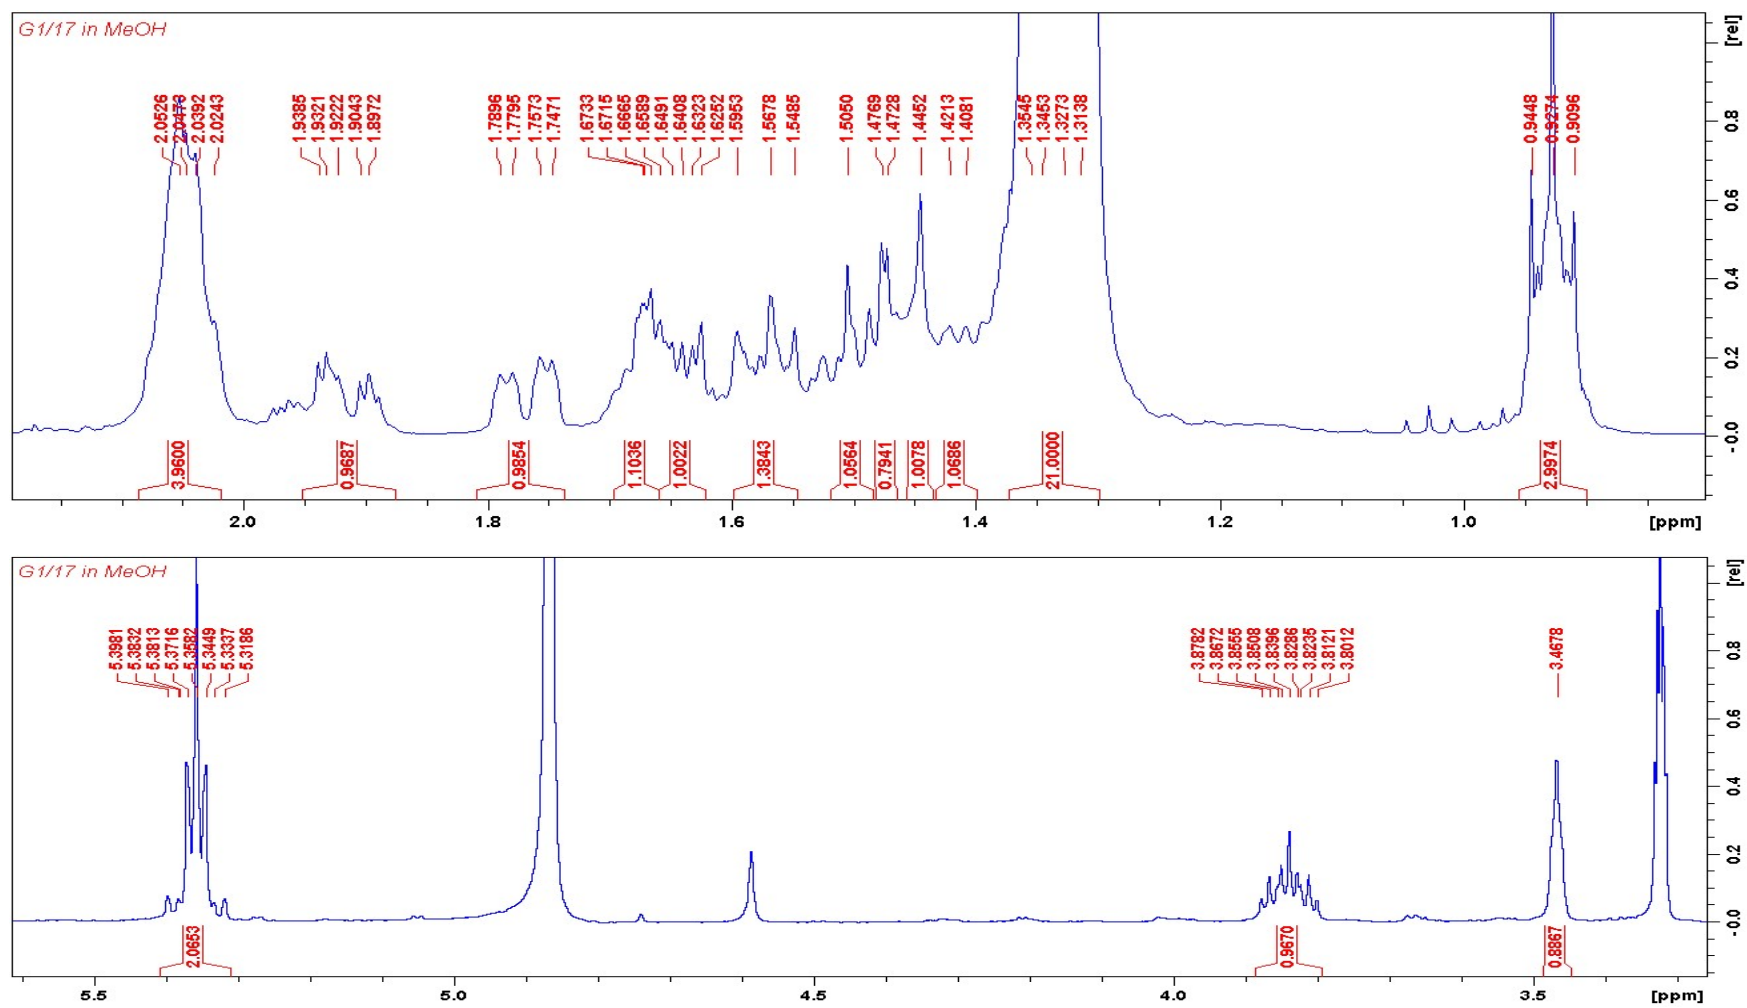

Figure S28. Expanded  $^1\text{H}$ -NMR spectra for (1*R*,2*S*,4*R*)-1,2,4-trihydroxy-4-[heptadec-12'(Z)-enyl]cyclohexane (**4**)

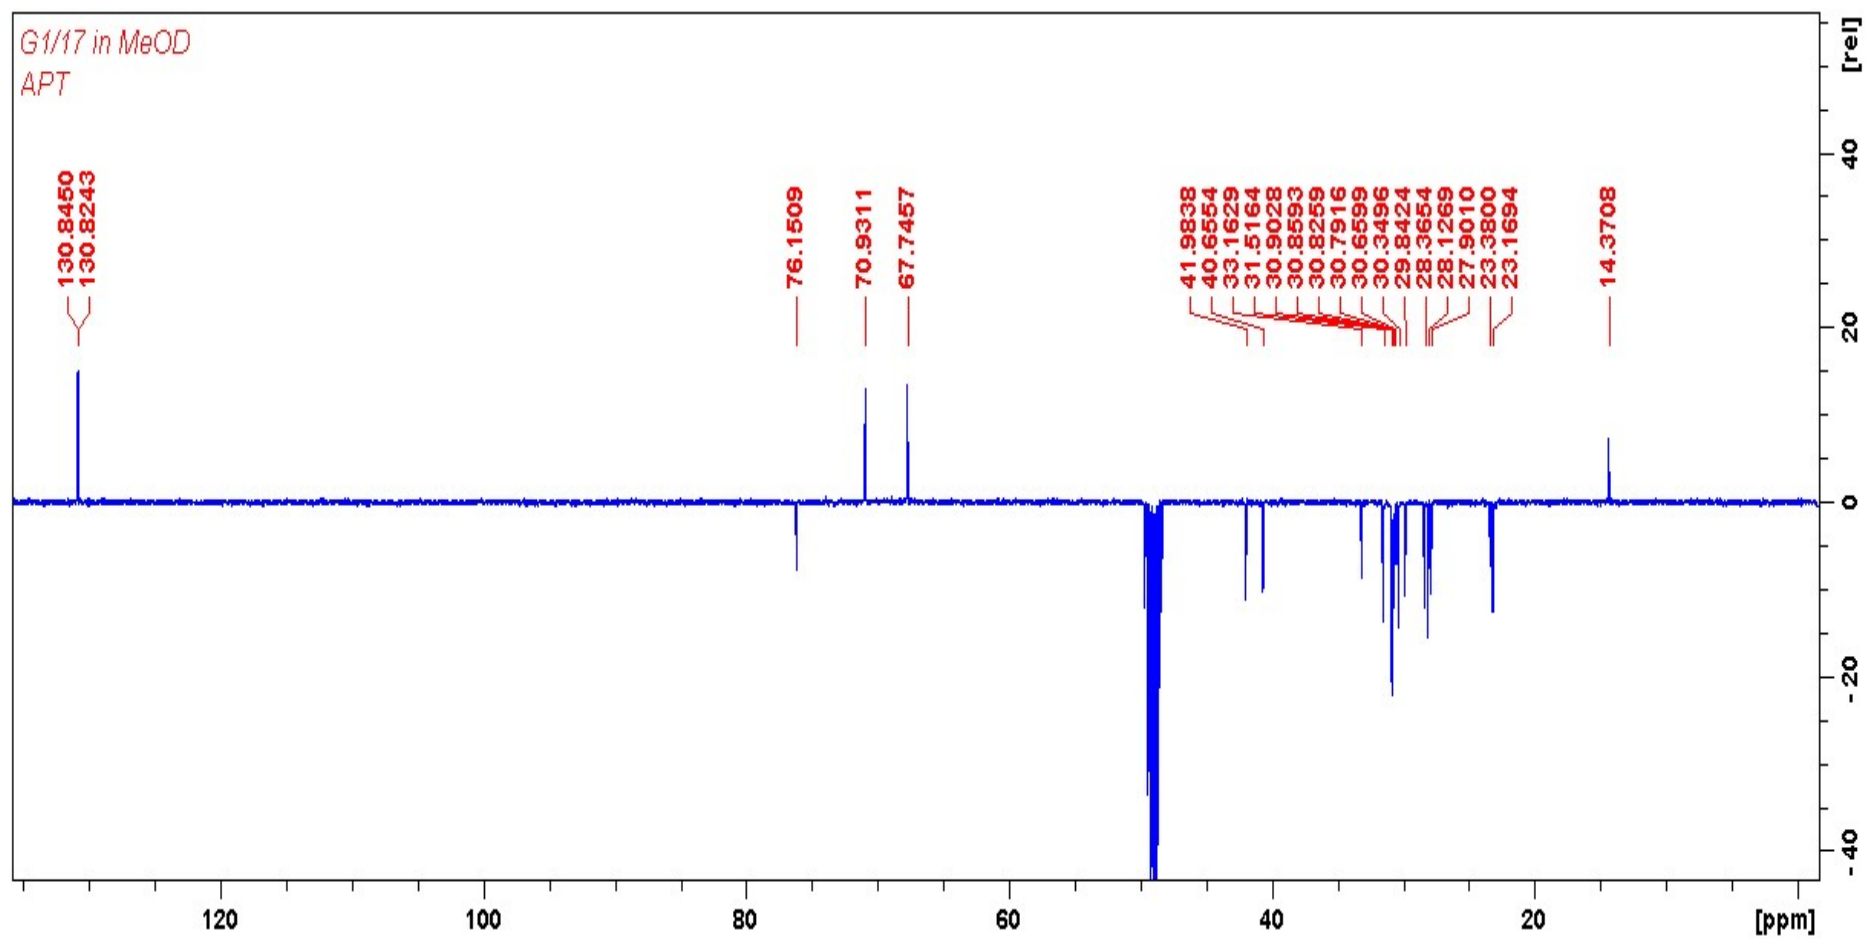

Figure S29. APT spectrum for (1*R*,2*S*,4*R*)-1,2,4-trihydroxy-4-[heptadec-12'(*Z*)-enyl]cyclohexane (4)

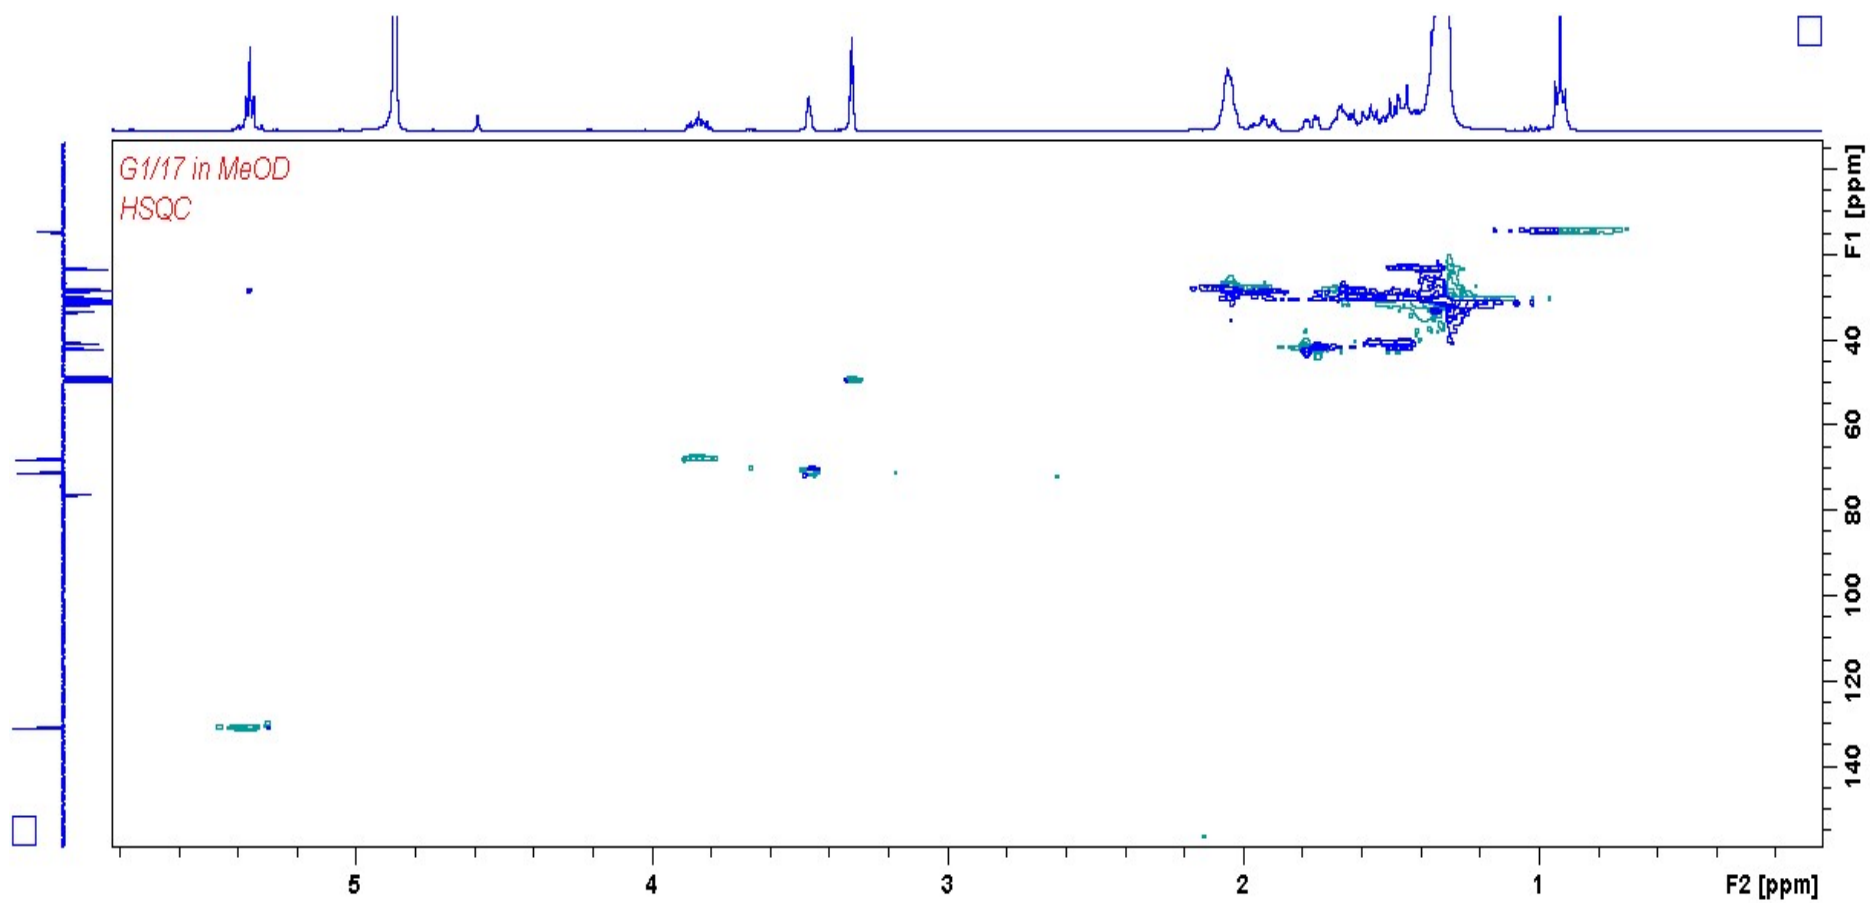

Figure S30. HSQC spectrum for (1*R*,2*S*,4*R*)-1,2,4-trihydroxy-4-[heptadec-12'(Z)-enyl]cyclohexane (**4**)

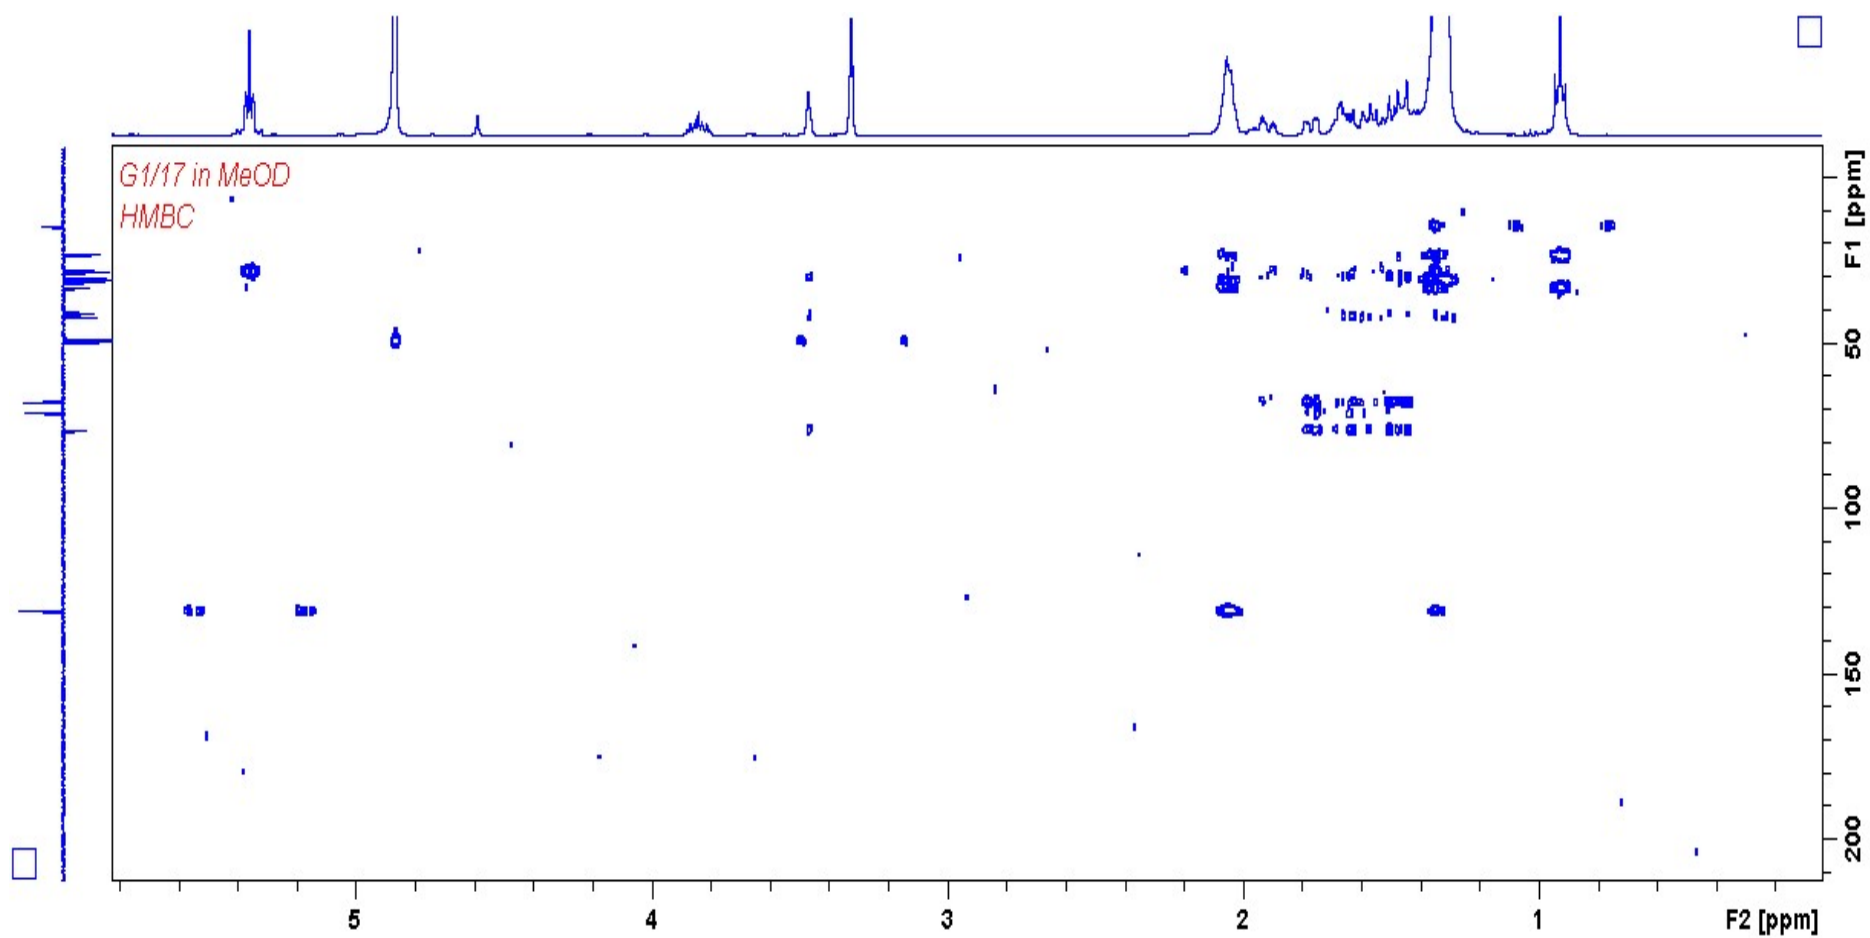

Figure S31. HMBC spectrum for (1*R*,2*S*,4*R*)-1,2,4-trihydroxy-4-[heptadec-12'(*Z*)-enyl]cyclohexane (4)



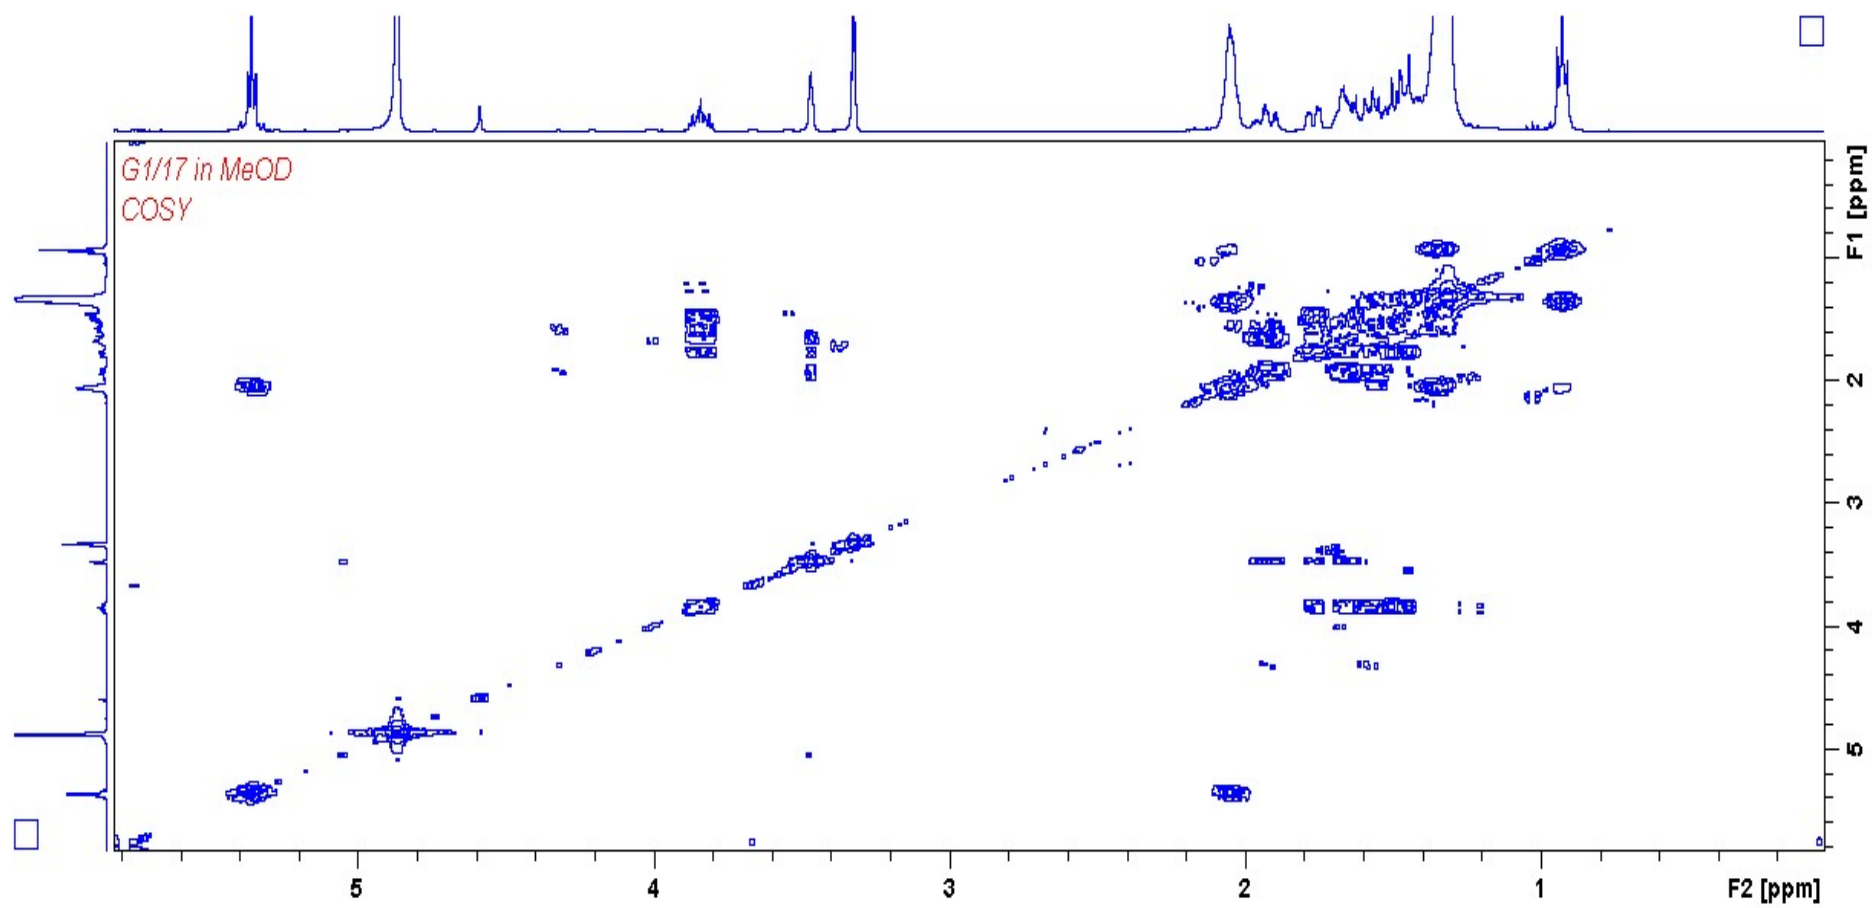

Figure S32. COSY spectrum for (1*R*,2*S*,4*R*)-1,2,4-trihydroxy-4-[heptadec-12'(*Z*)-enyl]cyclohexane (**4**)

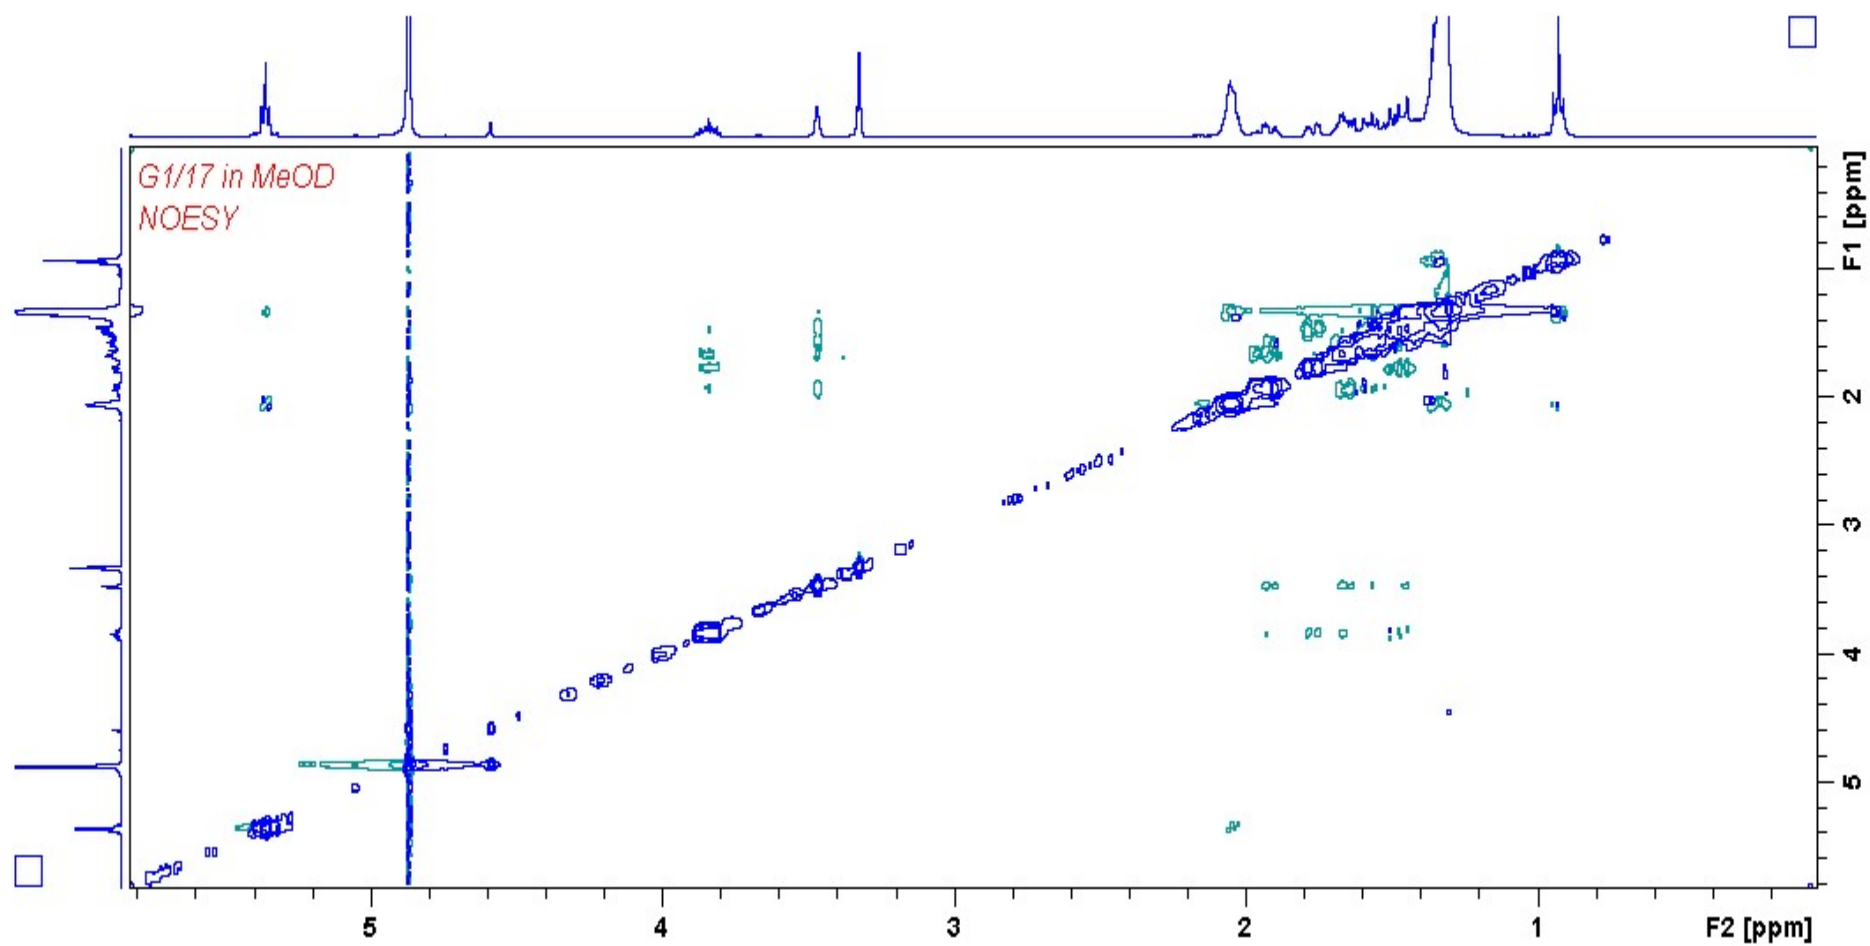

Figure S33. NOESY spectrum for (1R,2S,4R)-1,2,4-trihydroxy-4-[heptadec-12'(Z)-enyl]cyclohexane (4)

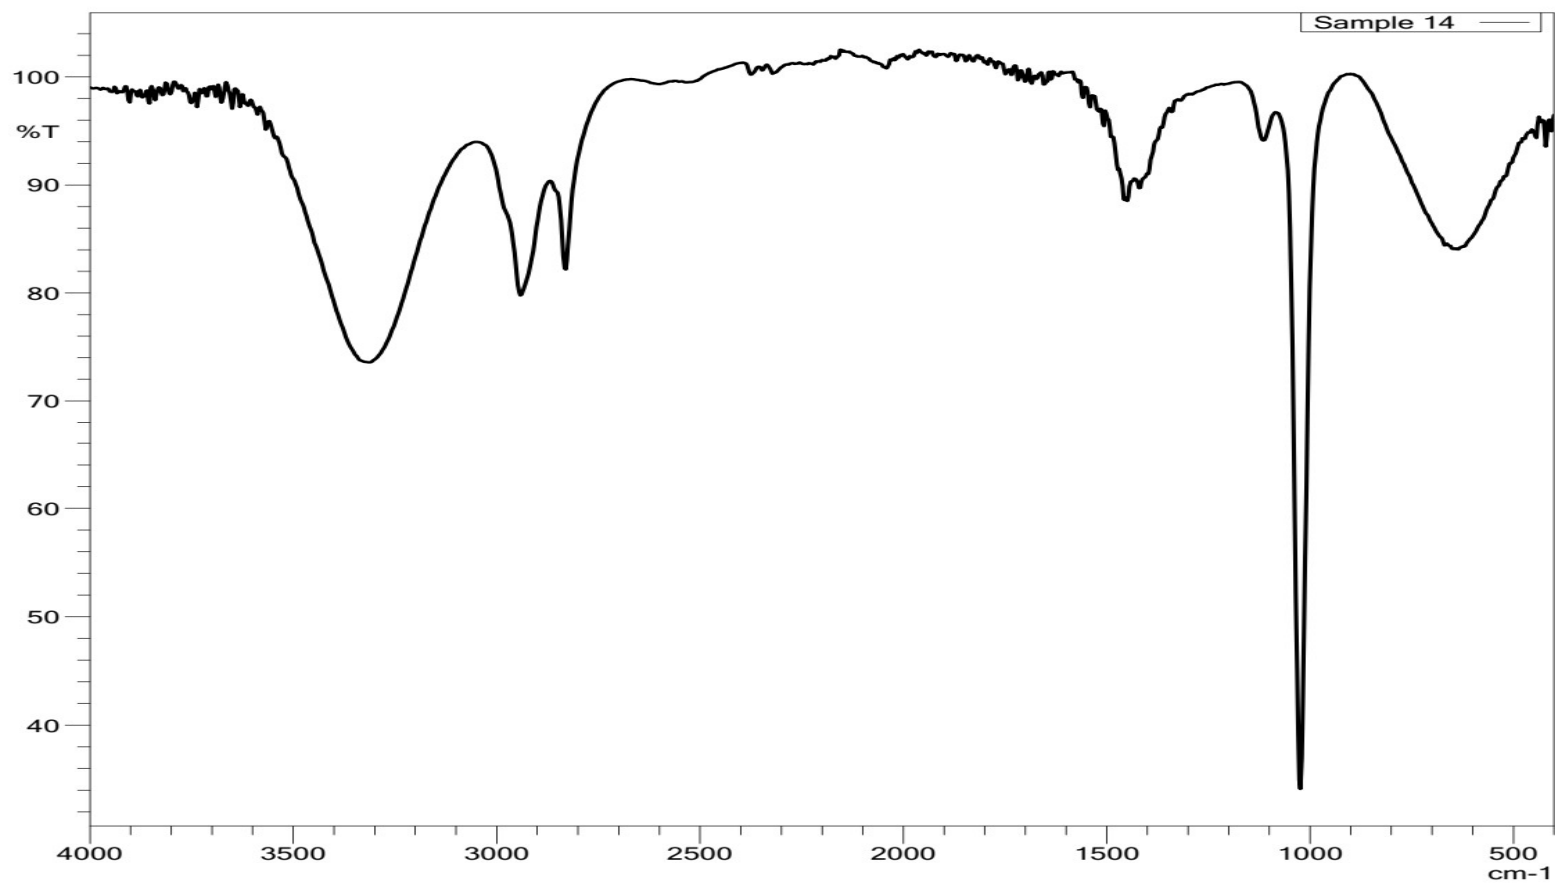

C:\LabSolutions\LabSolutionsIR\Data\Tebo Moswetsa\Sample 14.ispd

Figure S34. FTIR spectrum for (1R,2S,4R)-1,2,4-trihydroxy-4-[heptadec-12'(Z)-enyl]cyclohexane (4)

## Elemental Composition Report

Page 1

### Single Mass Analysis

Tolerance = 10.0 mDa / DBE: min = -1.5, max = 100.0

Element prediction: Off

Number of isotope peaks used for i-FIT = 3

Monoisotopic Mass, Even Electron Ions

72 formula(e) evaluated with 1 results within limits (up to 10 best isotopic matches for each mass)

Elements Used:

C: 1-30 H: 1-100 O: 0-20

SYNAPT HDMS G1

G1 12 Nov 2019 UPLC #3a 608 (12.594)

1: TOF MS ES+  
1.08e+003

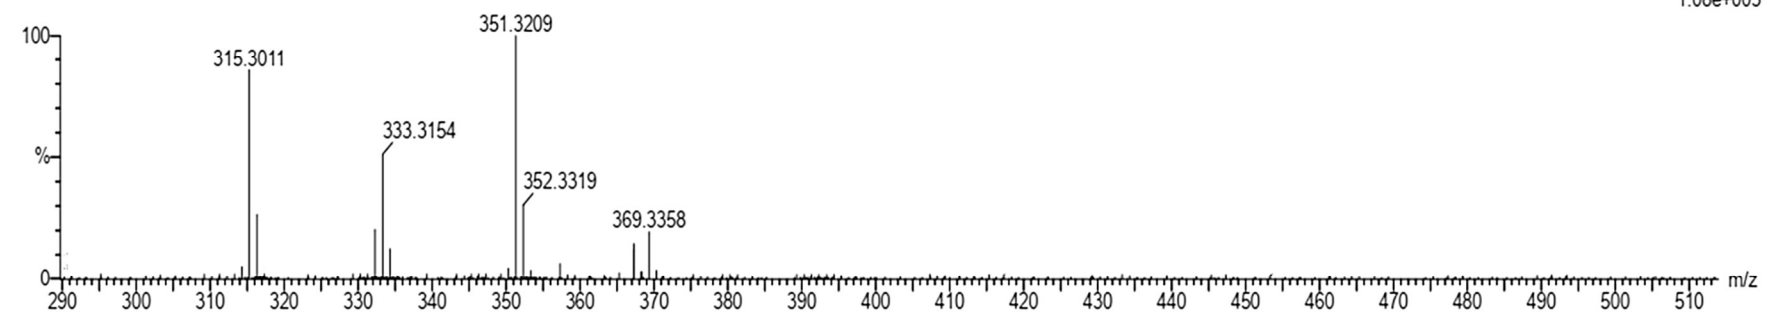

Minimum: -1.5  
Maximum: 10.0 10.0 100.0

| Mass     | Calc. Mass | mDa  | PPM  | DBE | i-FIT | i-FIT (Norm) | Formula    |
|----------|------------|------|------|-----|-------|--------------|------------|
| 369.3358 | 369.3369   | -1.1 | -3.0 | 1.5 | 21.1  | 0.0          | C23 H45 O3 |

Figure S35. HRMS for (1*R*,2*S*,4*R*)-1,2,4-trihydroxy-4-[heptadec-12'(*Z*)-enyl]cyclohexane (**4**)

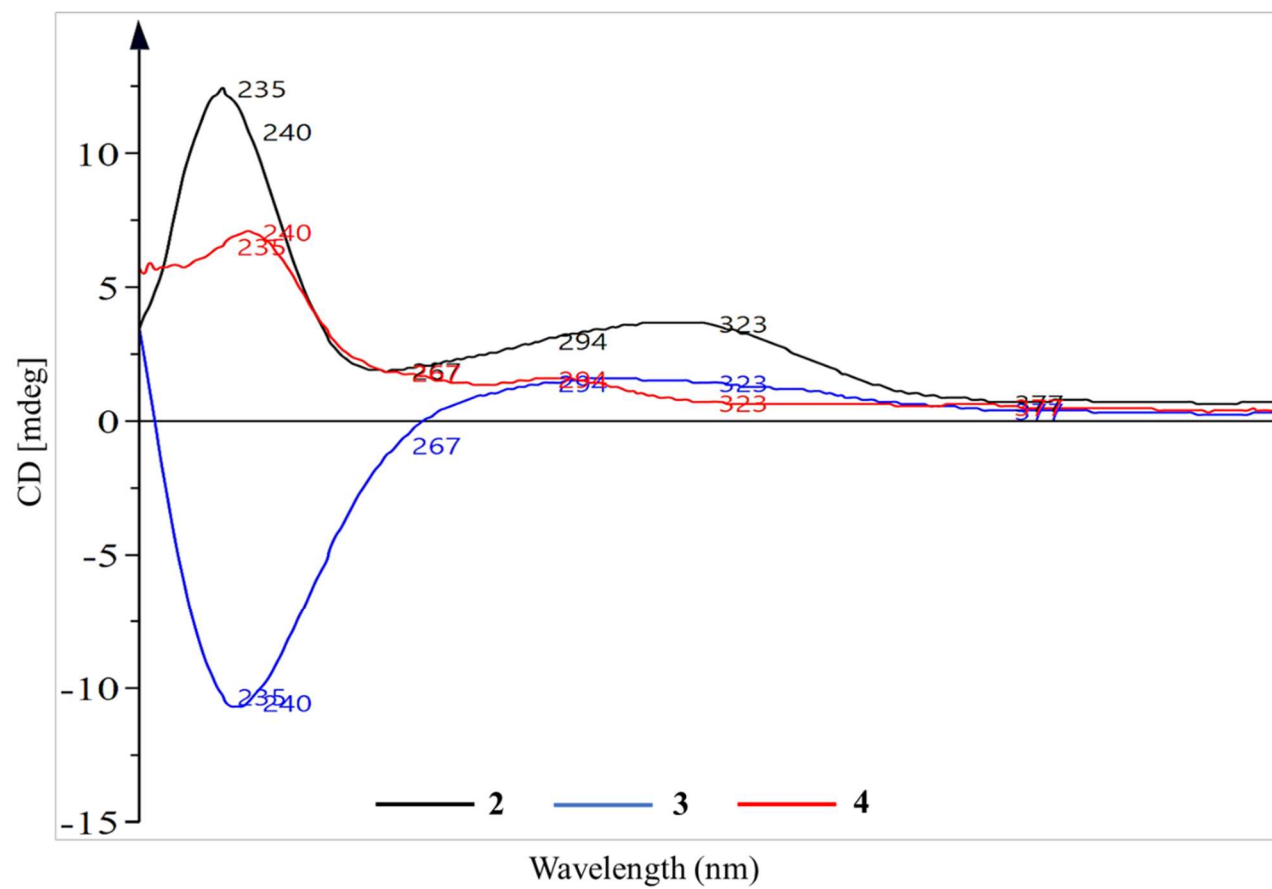

Figure S36. ECD spectra for compounds 2 – 4.
